# Supplementary material for: Cross-sectional associations of sedentary behaviour and physical activity on depression in Japanese older adults: an isotemporal substitution approach
Source: PubMed Central journal article supplement — BMJ Open. 2018 Sep 25;8(9):e022282. doi: 10.1136/bmjopen-2018-022282 (PMC6169747; doi:10.1136/bmjopen-2018-022282), 2018-09-25
Supplement: bmjopen-2018-022282.draft_revisions.pdf [file bmjopen-2018-022282.draft_revisions.pdf]

# BMJ Open

BMJ Open is committed to open peer review. As part of this commitment we make the peer review history of every article we publish publicly available.

When an article is published we post the peer reviewers' comments and the authors' responses online. We also post the versions of the paper that were used during peer review. These are the versions that the peer review comments apply to.

The versions of the paper that follow are the versions that were submitted during the peer review process. They are not the versions of record or the final published versions. They should not be cited or distributed as the published version of this manuscript.

BMJ Open is an open access journal and the full, final, typeset and author-corrected version of record of the manuscript is available on our site with no access controls, subscription charges or pay-per-view fees (<http://bmjopen.bmj.com>).

If you have any questions on BMJ Open's open peer review process please email [info.bmjopen@bmj.com](mailto:info.bmjopen@bmj.com)

# BMJ Open

## Impacts of substituting sedentary behavior with physical activity on older adults' depression

|                               |                                                                                                                                                                                                                                                                                                                                                                                                                                     |
|-------------------------------|-------------------------------------------------------------------------------------------------------------------------------------------------------------------------------------------------------------------------------------------------------------------------------------------------------------------------------------------------------------------------------------------------------------------------------------|
| Journal:                      | <i>BMJ Open</i>                                                                                                                                                                                                                                                                                                                                                                                                                     |
| Manuscript ID                 | bmjopen-2018-022282                                                                                                                                                                                                                                                                                                                                                                                                                 |
| Article Type:                 | Research                                                                                                                                                                                                                                                                                                                                                                                                                            |
| Date Submitted by the Author: | 13-Feb-2018                                                                                                                                                                                                                                                                                                                                                                                                                         |
| Complete List of Authors:     | Yasunaga, Akitomo; Bunka Gakuen University, Faculty of Liberal Arts and Sciences<br>Ai, Shibata; University of Tsukuba, Faculty of Health and Sport Sciences<br>ISHII, Kaori; Waseda University, Faculty of Sport Sciences<br>Koohsari, Javad; Waseda University, Faculty of Sport Sciences; Baker Heart and Diabetes Institute, Behavioural Epidemiology Laboratory<br>OKA, Koichiro; Faculty of Sport Sciences, Waseda University |
| Keywords:                     | MENTAL HEALTH, PUBLIC HEALTH, PREVENTIVE MEDICINE, Depression & mood disorders < PSYCHIATRY                                                                                                                                                                                                                                                                                                                                         |
|                               |                                                                                                                                                                                                                                                                                                                                                                                                                                     |

SCHOLARONE™  
Manuscripts

View Only

**Title Page**

Title of the article:

Impacts of substituting sedentary behavior with physical activity on older adults' depression

Akitomo Yasunaga<sup>1</sup>, Ai Shibata<sup>2</sup>, Kaori Ishii<sup>3</sup>, Mohammad Javad Koohsari<sup>3,4,5</sup>, and Koichiro Oka<sup>3</sup>

<sup>1</sup> Faculty of Liberal Arts and Sciences, Bunka Gakuen University, Shibuya-ku, Tokyo, Japan

<sup>2</sup> Faculty Health and Sport Sciences, University of Tsukuba, Tsukuba, Japan

<sup>3</sup> Faculty of Sport Sciences, Waseda University, Tokorozawa, Japan

<sup>4</sup> Behavioural Epidemiology Laboratory, Baker Heart and Diabetes Institute, Melbourne, Australia

<sup>5</sup> Mary MacKillop Institute for Health Research, Australian Catholic University, Melbourne, Australia

Word count (excluding title page, abstract, references, and tables): 1708 words

References: 23

Tables: 2

Address for correspondence: Akitomo Yasunaga, Faculty of Liberal Arts and Sciences, Bunka Gakuen University, 3-22-1 Yoyogi, Shibuya-ku, Tokyo, Japan

Telephone and Fax number: +81-3-3299-2361 E-mail: yasunaga@bunka.ac.jp

## ABSTRACT

**Objectives** Reducing sedentary behavior (SB) and increasing physical activity (PA) have been shown to be associated with decrease depression. However, there are yet few studies examining the potential benefits on older adults' depression, when SB is replaced with PA. This study aimed to examine the associations of objectively-assessed SB, light-intensity PA (LPA), and moderate-to-vigorous PA (MVPA) with depression among a sample of Japanese older adults, and to explore impacts of substituting SB with PA on older adults' depression.

**Design** Cross-sectional analysis.

**Setting** General community.

**Participants** A total of 276 older adults aged 65–85 years living in Japan.

**Main outcome measures** Three behaviors including the average daily time spent in SB ( $\leq 1.5$  METs); LPA ( $>1.5$  to  $<3.0$  METs); and MVPA ( $\geq 3.0$  METs) per day were calculated by accelerometers. Depression was assessed using the Japanese version of the 15-item Geriatric Depression scale (GDS-15).

**Results** Less SB ( $\beta = 0.129$ , 95%CI 0.015 to 0.243) and more LPA ( $\beta = -0.138$ , 95%CI -0.265 to -0.011) were found to be significantly and negatively associated with the GDS-15 score in the single-activity model. The isotemporal substitution model found that replacing 30 minutes/day of SB with LPA was significantly and negatively associated with the GDS-15 score ( $\beta = -0.131$ , 95%CI -0.260 to -0.002).

**Conclusions** These findings indicated that substituting even small amounts of SB with LPA may contribute to less depression in older adults. Potential favorable effects can be observed for replacing only 30 minutes per day of SB with LPA.

*Key words:* active behaviors, mental health, sitting time, objective measurements, aging.

## Article Summary

### Strength and limitations of this study

- The use of accelerometers to objectively measure participants' sedentary and active behaviors was the main strength of this study.

- We examined the impacts of substituting sedentary behavior with physical activity on older adults' depression by using the isotemporal substitution approach.

- As a cross-sectional study, we were unable to infer a cause-and-effect relationship between sedentary behavior, physical activity, and depressive symptoms.

## INTRODUCTION

Regular physical activity (PA), especially moderate-to-vigorous PA (MVPA) (e.g., exercise, sports, and brisk walking), has been found to be associated with less depression among older adults<sup>1,2</sup>. Recent studies have also demonstrated that sedentary behavior (SB) (e.g., television viewing, computer use, and sitting in cars) and light-intensity PA (LPA) (e.g., housework, gardening, and casual walking) are closely related to depression : less SB<sup>3</sup> and more LPA<sup>4</sup> were found to be favorably associated with older adults' depression.

Several recent studies have examined how replacing one activity with another (e.g., replacing SB with LPA or MVPA) can affect various health outcomes such as all-cause mortality and cardiovascular disease using the isotemporal substitution (IS) approach<sup>5,6</sup>. The IS approach enables researchers to simultaneously model a specific activity being performed and an activity being displaced in an equal time-exchange manner<sup>6</sup>. There is only one previous study, in our knowledge, examining the potential benefits on depression, when SB is replaced with LPA or MVPA<sup>7</sup>. Mekary et al. found that replacing 60 minutes/day of television watching with the same time of fast walking was associated with lower depression risk<sup>7</sup>. However, they used self-reported measures of PA and SB, which are subject to recall bias (i.e., lack of accuracy, validity, and reproducibility)<sup>8</sup>. In addition, their sample included middle- and older-aged people. It is not clear yet how replacing SB with other activities may affect depression among a total sample of elderly people.

Therefore, this study aims to examine the associations of objectively-assessed SB, LPA, and MVPA with depression among a sample of Japanese older adults, and to explore impacts of substituting SB with PA on older adults' depression by using the IS approach.

## METHODS

## Participants and Data Collection

This study used cross-sectional data from a larger epidemiological study conducted in Matsudo city, Japan. A postal survey was sent to 3,000 residents aged 65-85 years who were randomly-selected from the registry of residential addresses. A total number of 349 participants (of 1,250 people who responded to the postal survey) attended in a sub-study, in which PA/SB were objectively calculated. Written informed consent was obtained from all participants.

## Measurements

Accelerometers (Active style Pro HJA-350IT, Omron Healthcare, Kyoto, Japan) were used to objectively measure participants' PA and SB. The detailed algorithm and validity of the accelerometer device have been described elsewhere<sup>9-11</sup>. The device evaluates the intensity of activity by METs using a built-in algorithm. Participants were guided to wear the accelerometer on their waist for at least 7 days —except when sleeping or during water-based activities. To be included in the study, participants needed to wear the accelerometer for  $\geq 4$  days (including 1 weekend day), with at least 10 hour/day of wear time each day (Healy, Matthews, Dunstan, Winkler, & Owen, 2011). Non-wear time was defined as at least consecutive 60 minutes of 0 cpm, with allowance for up to 2 min of some limited movement ( $< 50$  cpm)<sup>12</sup>. The daily average time spent on SB ( $\leq 1.5$  METs), LIPA ( $> 1.5$  to  $< 3.0$  METs) and MVPA ( $\geq 3.0$  METs) were calculated. These MET levels have been used by previous studies examining functional decline among older adults<sup>13,14</sup>.

Depression was assessed using the Japanese language version of the 15-item Geriatric Depression scale (GDS-15)<sup>15</sup>. The score ranges from 0 to 15 and higher scores indicated stronger depression tendency.

The following individual-level variables were considered as covariates: gender, age,

1  
2  
3 body mass index, physical function, marital status, and educational attainment. Body mass  
4 index was objectively calculated by measuring the participants' height and weight. Physical  
5  
6 index was objectively calculated by measuring the participants' height and weight. Physical  
7  
8 function was assessed using the Japanese language version of the Medical Outcomes Survey  
9  
10 Short Form-8 questionnaire <sup>16</sup>.

### 14 **Statistical Analysis**

15  
16 Three multiple linear regression models including a single-activity, a partition, and an IS  
17  
18 model were conducted to examine the associations of SB, LPA, and MVPA with depression.  
19  
20 Since a 30 minutes was used as a unit for activity, the IS models assessed the effect of  
21  
22 replacing a 30-minute of one activity with the equal time of another activity. The  
23  
24 single-activity model analyzed each activity component separately (e.g., SB only), without  
25  
26 considering the other activity types, adjusting for total wear time and confounders. The model  
27  
28 (in the case of SB) is shown as follows:  
29  
30

31 The GDS-15 score = (b0) SB + (b3) total wear time + (b4) covariates.

32  
33  
34 The partition model analyzed all the activities simultaneously, without adjusting for  
35  
36 total wear time. It is shown as below:

37  
38 The GDS-15 score = (b0) SB + (b1) LPA + (b2) MVPA + (b4) covariates.

39  
40 The coefficient for one type of activity represents the effect of increasing this type of  
41  
42 activity while holding the other activities constant in this model. The model represents the  
43  
44 effects of adding rather than substituting an activity type, because the total wear time is not  
45  
46 included in the model (thus is not held constant).

47  
48  
49 The IS model assessed the effect of substituting one activity type with another for  
50  
51 the equal amount of time (e.g., replacing LPA with SB, by removing SB from the model). The  
52  
53 IS model (in the case of omitting SB from the model) is shown as follows:  
54

55 The GDS-15 score = (b1) LPA + (b2) MVPA + (b3) total wear time + (b4) covariates.



1  
2  
3 The coefficients b1 and b2 in this model represent the effect of a 30 minutes  
4 substitution of SB with one of the activity types (LPA, or MVPA), while holding the other  
5 activity types and total wear time constant. For instance, b1 can be interpreted as the effect of  
6 replacing SB with LPA for 30 minutes, while holding MVPA and total wear time constant.  
7  
8  
9

10  
11 All analyses were conducted using IBM SPSS Statistics 20.0 for Windows (IBM  
12 Japan Corp., Tokyo, Japan), and the level of significance was set at  $p < 0.05$ .  
13  
14  
15  
16

## 17 18 **RESULTS**

19  
20 After excluding those with missing data (missing covariates and lacking valid PA  
21 accelerometer data), data from 276 participants (171 men, 105 women) were analyzed. Table  
22 1 shows the characteristics of study participants. The mean number of valid days of  
23 participant's wearing accelerometer was 7.2 days (SD = 0.9). On average, participants wore  
24 accelerometers for 15 hours/day, and the mean proportion of SB, LPA, and MVPA times to  
25 total accelerometer wearing time were 58%, 36%, and 6%, respectively. Correlation  
26 coefficients were  $-0.68$  between SB and LPA,  $-0.34$  between SB and MVPA, and  $0.21$   
27 between LPA and MVPA. Table 2 shows the results for the single activity, partition, and IS  
28 models with adjusting for covariates. The single-activity model shows that LPA was  
29 significantly and favorably associated with the GDS-15 score ( $\beta = -.138, p < .05$ ), and SB  
30 was significantly and positively associated with the GDS-15 score ( $\beta = .129, p < .05$ ). The  
31 partition model showed no significant associations between all activities with the GDS-15  
32 score. The IS model showed that a 30-minutes unit of SB replaced with LPA to be  
33 significantly and negatively associated with the GDS-15 score ( $\beta = -.131, p < .05$ ).  
34  
35  
36  
37  
38  
39  
40  
41  
42  
43  
44  
45  
46  
47  
48  
49  
50  
51  
52

## 53 **DISCUSSION**

54  
55 This study examined how objectively-measured SB, LPA, and MVPA are associated with  
56  
57  
58  
59  
60

1  
2  
3 depression among Japanese older adults, and how replacing these behaviors may influence  
4 depression. Although many studies suggested that PA has favorable effects on depression in  
5 both clinical and non-clinical population<sup>17-19</sup>, there is yet no consistent evidence on how PA  
6 intensity is effective for less depression. We found less SB and more LPA to be negatively  
7 associated with older adults' depression in a single-activity model (including total time held  
8 constant). Our findings are consistent with some recent studies that demonstrated the  
9 favorable effects of LPA or reducing SB on depression for older adults<sup>4,20,21</sup>.

10  
11  
12  
13  
14  
15  
16  
17  
18 In contrast with some previous studies<sup>22</sup>, we did not find any favorable effects of  
19 MVPA on depression in the three multiple linear regression models. This may be because of  
20 the age group (older adults), which was targeted in the current study. While relatively  
21 consistent effects of MVPA on depression among children and adults were reported by  
22 previous studies<sup>22</sup>, there are mixed findings among older adults<sup>23</sup>. For example, Jung et al.  
23 found that LPA was favorably associated with preventing depressive symptoms among older  
24 adults, but MVPA was not. Nevertheless, our findings showed that replacing SB with LPA  
25 had beneficial effects on older adults' depression<sup>23</sup>. We found that replacing only 30 minutes  
26 of SB with equal time of LPA during one day was associated with approximately 5% less  
27 depression score. For older adults including physical frail people, it will be effective to  
28 reduce SB time and increase LPA that accounts for a large proportion of activities in daily life  
29 in order to decrease depression. Among older adults, it may be more practical to increase 30  
30 minutes of LPA per day compared with MVPA. The limitations of this study include its  
31 cross-sectional design and the exclusion of contents (e.g. mentally stimulating activity, or  
32 different activity) of activity on depression. The strength of this study is the use of  
33 accelerometers to objectively measure participants' sedentary and active behaviors.  
34  
35  
36  
37  
38  
39  
40  
41  
42  
43  
44  
45  
46  
47  
48  
49  
50  
51  
52  
53  
54  
55

## 56 CONCLUSION

1  
2  
3 Our findings indicated that replacing even small amounts of SB (e.g. watching TV and  
4 working at a desk) with LPA (e.g. indoor house-work and slow walking) are associated with  
5 less depression among older adults. Potential favorable effects were identified for replacing  
6 only 30 minutes per day of SB with LPA. These findings are useful in promoting mental  
7 health among older adults with better compliance, lower risk of injuries, and long-term  
8 sustainability  
9  
10  
11  
12  
13  
14  
15  
16  
17

### 18 **Acknowledge**

19 None.  
20  
21  
22  
23  
24

### 25 **Contributors**

26 All authors contributed equally to this work. Oka: Study concept and design. Yasunaga,  
27 Shibata, Ishii, and Oka: Data analysis and interpretation and Statistical analysis. Yasunaga  
28 and Koohsari: Drafting of manuscript. Yasunaga, Koohsari, and Oka: Critical revision of  
29 manuscript for intellectual content, final approval of version to be published.  
30  
31  
32  
33  
34  
35  
36  
37

### 38 **Funding**

39 Yasunaga was supported by the JSPS KAKENHI Grant (#15K01534). Shibata was supported  
40 the JSPS KAKENHI Grant (#15K01647). Koohsari was supported by the JSPS Postdoctoral  
41 Fellowship for Research in Japan (#17716). Oka was supported by the MEXT-Supported  
42 Program for the Strategic Research Foundation at Private Universities, 2015-2019 the Japan  
43 Ministry of Education, Culture, Sports, Science and Technology (S1511017).  
44  
45  
46  
47  
48  
49  
50  
51  
52

### 53 **Competing interest**

54 None declared.  
55  
56  
57  
58  
59  
60

## Ethics approval

The study was approved by the Waseda University Institutional Committee on Human Research (2013-265), and the Institutional Review Board of Chiba Prefectural University of Health Sciences (2012-042).

## Data sharing statement

No additional data sharing available.

## REFERENCES

1. Nelson ME, Rejeski WJ, Blair SN, et al. Physical activity and public health in older adults: recommendation from the American College of Sports Medicine and the American Heart Association. *Circulation* 2007;116:1094-105.
2. Netz Y, Wu MJ, Becker BJ, et al. Physical activity and psychological well-being in advanced age: a meta-analysis of intervention studies. *Psychol Aging* 2005;20:272-84.
3. Hamer M, Stamatakis E. Prospective study of sedentary behavior, risk of depression, and cognitive impairment. *Med Sci Sports Exerc* 2014;46:718-23.
4. Loprinzi PD. Objectively measured light and moderate-to-vigorous physical activity is associated with lower depression levels among older US adults. *Aging Ment Health* 2013;17:801-5.
5. Buman MP, Winkler EA, Kurka JM, et al. Reallocating time to sleep, sedentary behaviors, or active behaviors: associations with cardiovascular disease risk biomarkers, NHANES 2005-2006. *Am J Epidemiol* 2014;179:323-34.
6. Stamatakis E, Rogers K, Ding D, et al. All-cause mortality effects of replacing sedentary time with physical activity and sleeping using an isotemporal substitution model: a

- 1  
2  
3 prospective study of 201,129 mid-aged and older adults. *Int J Behav Nutr Phys Act*  
4 2015;12:121.  
5  
6  
7  
8 7. Mekary RA, Lucas M, Pan A, et al. Isotemporal substitution analysis for physical activity,  
9 television watching, and risk of depression. *Am J Epidemiol* 2013;178:474-83.  
10  
11  
12 8. Stewart AL, Mills KM, King AC, et al. CHAMPS physical activity questionnaire for  
13 older adults: outcomes for interventions. *Med Sci Sports Exerc* 2001;33:1126-41.  
14  
15  
16 9. Kurita S, Yano S, Ishii K, et al. Comparability of activity monitors used in Asian and  
17 Western-country studies for assessing free-living sedentary behaviour. *PLoS One*  
18 2017;12:e0186523.  
19  
20  
21  
22  
23 10. Ohkawara K, Oshima Y, Hikiyama Y, et al. Real-time estimation of daily physical activity  
24 intensity by a triaxial accelerometer and a gravity-removal classification algorithm. *Br J*  
25 *Nutr* 2011;105:1681-91.  
26  
27  
28  
29  
30 11. Oshima Y, Kawaguchi K, Tanaka S, et al. Classifying household and locomotive  
31 activities using a triaxial accelerometer. *Gait Posture* 2010;31:370-4.  
32  
33  
34 12. Healy GN, Matthews CE, Dunstan DW, et al. Sedentary time and cardio-metabolic  
35 biomarkers in US adults: NHANES 2003-06. *Eur Heart J* 2011;32:590-7.  
36  
37  
38 13. Blair CK, Morey MC, Desmond RA, et al. Light-intensity activity attenuates functional  
39 decline in older cancer survivors. *Med Sci Sports Exerc* 2014;46:1375-83.  
40  
41  
42 14. Chmelo E, Nicklas B, Davis C, et al. Physical activity and physical function in older  
43 adults with knee osteoarthritis. *J Phys Act Health* 2013;10:777-83.  
44  
45  
46 15. Niino N, Imaizumi T, Kawakami N. A Japanese translation of the Geriatric Depression  
47 Scale. *Clin Gerontol* 1991;10:85-7.  
48  
49  
50 16. Fukuhara S, Suzukamo Y. Manual of the SF-8 Japanese Version. Kyoto: Institute for  
51 Health Outcome & Process Evaluation Research; 2004.  
52  
53  
54  
55  
56  
57  
58  
59  
60

- 1  
2  
3 17. Rebar AL, Stanton R, Geard D, et al. A meta-meta-analysis of the effect of physical  
4 activity on depression and anxiety in non-clinical adult populations. *Health Psychol Rev*  
5 2015;9:366-78.  
6  
7
- 8  
9 18. Cooney GM, Dwan K, Greig CA, et al. Exercise for depression. *Cochrane Database Syst*  
10 *Rev* 2013;12:CD004366.  
11  
12
- 13 19. Fukukawa Y, Nakashima C, Tsuboi S, et al. Age differences in the effect of physical  
14 activity on depressive symptoms. *Psychol Aging* 2004;19:346-51.  
15  
16
- 17 20. Tse AC, Wong TW, Lee PH. Effect of Low-intensity exercise on physical and cognitive  
18 health in older adults: a systematic review. *Sports Med Open* 2015;1:37.  
19  
20
- 21 21. Zhai L, Zhang Y, Zhang D. Sedentary behaviour and the risk of depression: a  
22 meta-analysis. *Br J Sports Med* 2015;49:705-9.  
23  
24
- 25 22. Dore I, O'Loughlin JL, Beauchamp G, et al. Volume and social context of physical  
26 activity in association with mental health, anxiety and depression among youth. *Prev*  
27 *Med* 2016;91:344-50.  
28  
29
- 30 23. Jung S, Lee S, Lee S, et al. Relationship between physical activity levels and depressive  
31 symptoms in community-dwelling older Japanese adults. *Geriatr Gerontol Int* 2017  
32 [Epub ahead of print]  
33  
34  
35  
36  
37  
38  
39  
40  
41  
42  
43  
44  
45  
46  
47  
48  
49  
50  
51  
52  
53  
54  
55  
56  
57  
58  
59  
60

Table 1. Characteristics of study participants

|                                                                              | n or M (SD), % |       |
|------------------------------------------------------------------------------|----------------|-------|
| Gender                                                                       |                |       |
| <i>Women</i>                                                                 | 105            | 38.0% |
| Age (years)                                                                  | 74.4           | 5.3   |
| Body mass index (kg/m <sup>2</sup> )                                         | 23.5           | 3.2   |
| Physical function                                                            | 49.7           | 5.3   |
| Marital status                                                               |                |       |
| <i>Married</i>                                                               | 228            | 82.6% |
| Educational attainment                                                       |                |       |
| <i>University, junior college, vocational school, or higher-level degree</i> | 109            | 39.5% |
| Total accelerometer wear time (min/day)                                      | 902.9          | 86.7  |
| SB (min/day)                                                                 | 524.6          | 113.3 |
| LPA (min/day)                                                                | 328.8          | 101.3 |
| MVPA (min/day)                                                               | 50.0           | 32.8  |
| GDS-15 score                                                                 | 2.8            | 3.0   |

*Note.* SB=Sedentary behavior, LPA=Light-intensity physical activity, MVPA= Moderate-to-vigorous physical activity, GDS-15 = the 15-item Geriatric Depression scale.

Table 2. The associations of SB, LPA, and MVPA with depression

|                       | SB      |                 | LPA     |                   | MVPA    |                 |
|-----------------------|---------|-----------------|---------|-------------------|---------|-----------------|
|                       | $\beta$ | 95%CI           | $\beta$ | 95%CI             | $\beta$ | 95%CI           |
| Single-activity model | 0.129   | (0.015, 0.243)* | -0.138  | (-0.265, -0.011)* | -0.173  | (-0.530, 0.184) |
| Partition model       | 0.101   | (-0.031, 0.233) | -0.030  | (-0.184, 0.124)   | -0.011  | (-0.390, 0.367) |
| Isotemporal model     |         |                 |         |                   |         |                 |
| Replace SB with       |         | Dropped         | -0.131  | (-0.260, -0.002)* | -0.113  | (-0.473, 0.247) |
| Replace LPA with      | 0.132   | (0.003, 0.261)* |         | Dropped           | 0.020   | (-0.383, 0.422) |
| Replace MVPA with     | 0.118   | (-0.242, 0.477) | -0.013  | (-0.395, 0.361)   |         | Dropped         |

*Note.* SB=Sedentary behavior, LPA=Light-intensity physical activity, MVPA=Moderate-to-vigorous physical activity,  $\beta$ = Regression coefficients correspond to a 30-minutes increment of each activity, CI= Confidence intervals, \*  $p < 0.05$ .

All models adjusted for gender, age, body mass index, physical function, marital status, educational attainment, and total accelerometer wear time.



| Item                         | #  | Recommendation                                                                                                                                                                             | Response                                                  |
|------------------------------|----|--------------------------------------------------------------------------------------------------------------------------------------------------------------------------------------------|-----------------------------------------------------------|
| <b>Title and Abstract</b>    | 1  | (a) Indicate the study's design with a commonly used term in the title or the abstract                                                                                                     | Yes                                                       |
|                              |    | (b) Provide in the abstract an informative and balanced summary of what was done and what was found                                                                                        | Yes                                                       |
| <b>Introduction</b>          |    |                                                                                                                                                                                            |                                                           |
| Background/rationale         | 2  | Explain the scientific background and rationale for the investigation being reported                                                                                                       | Yes                                                       |
| Objectives                   | 3  | State specific objectives, including any prespecified hypotheses                                                                                                                           | Yes                                                       |
| <b>Methods</b>               |    |                                                                                                                                                                                            |                                                           |
| Study design                 | 4  | Present key elements of study design early in the paper                                                                                                                                    | Yes                                                       |
| Setting                      | 5  | Describe the setting, locations, and relevant dates, including periods of recruitment, exposure, follow-up, and data collection                                                            | Yes (see "Participants and Data Collection")              |
| Participants                 | 6  | (a) <i>Cohort study</i> —Give the eligibility criteria, and the sources and methods of selection of participants. Describe methods of follow-up                                            | Yes (see "Participants and Data Collection")              |
|                              |    | <i>Case-control study</i> —Give the eligibility criteria, and the sources and methods of case ascertainment and control selection. Give the rationale for the choice of cases and controls |                                                           |
|                              |    | <i>Cross-sectional study</i> —Give the eligibility criteria, and the sources and methods of selection of participants                                                                      | NA                                                        |
|                              |    | (b) <i>Cohort study</i> —For matched studies, give matching criteria and number of exposed and unexposed                                                                                   |                                                           |
|                              |    | <i>Case-control study</i> —For matched studies, give matching criteria and the number of controls per case                                                                                 |                                                           |
| Variables                    | 7  | Clearly define all outcomes, exposures, predictors, potential confounders, and effect modifiers. Give diagnostic criteria, if applicable                                                   | Yes (see "Measurements")                                  |
| Data sources/<br>measurement | 8* | For each variable of interest, give sources of data and details of methods of assessment (measurement). Describe comparability of assessment methods if there is more than one group       | Yes (see "Measurements")                                  |
| Bias                         | 9  | Describe any efforts to address potential sources of bias                                                                                                                                  | Yes (see "Results" for the list of excluded participants) |
| Study size                   | 10 | Explain how the study size was arrived at                                                                                                                                                  | This is a secondary analysis of a study                   |
| Quantitative variables       | 11 | Explain how quantitative variables were handled in the analyses. If applicable, describe which groupings were chosen and why                                                               | Yes (see "Statistical Analysis")                          |

|                     |     |                                                                                                                                                                                                              |                                                                                                      |
|---------------------|-----|--------------------------------------------------------------------------------------------------------------------------------------------------------------------------------------------------------------|------------------------------------------------------------------------------------------------------|
| Statistical methods | 12  | (a) Describe all statistical methods, including those used to control for confounding                                                                                                                        | Yes (see “Statistical Analysis”)                                                                     |
|                     |     | (b) Describe any methods used to examine subgroups and interactions                                                                                                                                          | Yes (see “Statistical Analysis”)                                                                     |
|                     |     | (c) Explain how missing data were addressed                                                                                                                                                                  | Yes (see “Results”)                                                                                  |
|                     |     | (d) <i>Cohort study</i> —If applicable, explain how loss to follow-up was addressed                                                                                                                          |                                                                                                      |
|                     |     | <i>Case-control study</i> —If applicable, explain how matching of cases and controls was addressed                                                                                                           | NA                                                                                                   |
|                     |     | <i>Cross-sectional study</i> —If applicable, describe analytical methods taking account of sampling strategy                                                                                                 |                                                                                                      |
|                     |     | (e) Describe any sensitivity analyses                                                                                                                                                                        | NA                                                                                                   |
| <b>Results</b>      |     |                                                                                                                                                                                                              |                                                                                                      |
| Participants        | 13* | (a) Report numbers of individuals at each stage of study—eg numbers potentially eligible, examined for eligibility, confirmed eligible, included in the study, completing follow-up, and analysed            | Yes (see “Results”)                                                                                  |
|                     |     | (b) Give reasons for non-participation at each stage                                                                                                                                                         | NA                                                                                                   |
|                     |     | (c) Consider use of a flow diagram                                                                                                                                                                           | This is not a complicated study. We think that text explanation is sufficient.                       |
| Descriptive data    | 14* | (a) Give characteristics of study participants (eg demographic, clinical, social) and information on exposures and potential confounders                                                                     | Yes (see Table 1)                                                                                    |
|                     |     | (b) Indicate number of participants with missing data for each variable of interest                                                                                                                          | Yes                                                                                                  |
|                     |     | (c) <i>Cohort study</i> —Summarise follow-up time (eg, average and total amount)                                                                                                                             | NA                                                                                                   |
| Outcome data        | 15* | <i>Cohort study</i> —Report numbers of outcome events or summary measures over time                                                                                                                          | NA                                                                                                   |
|                     |     | <i>Case-control study</i> —Report numbers in each exposure category, or summary measures of exposure                                                                                                         | NA                                                                                                   |
|                     |     | <i>Cross-sectional study</i> —Report numbers of outcome events or summary measures                                                                                                                           | Yes (see Table 1)                                                                                    |
| Main results        | 16  | (a) Give unadjusted estimates and, if applicable, confounder-adjusted estimates and their precision (eg, 95% confidence interval). Make clear which confounders were adjusted for and why they were included | We reported only the adjusted estimates in order not to inflate the results with too many estimates. |
|                     |     | (b) Report category boundaries when continuous variables were categorized                                                                                                                                    | Yes                                                                                                  |
|                     |     | (c) If relevant, consider translating estimates of relative risk into absolute risk for a meaningful time period                                                                                             | NA                                                                                                   |

1  
2  
3  
4  
5  
6  
7  
8  
9  
10  
11  
12  
13  
14  
15  
16  
17  
18  
19  
20  
21  
22  
23  
24  
25  
26  
27  
28  
29  
30  
31  
32  
33  
34  
35  
36  
37  
38  
39  
40  
41  
42  
43  
44  
45  
46  
47

|                          |    |                                                                                                                                                                            |     |
|--------------------------|----|----------------------------------------------------------------------------------------------------------------------------------------------------------------------------|-----|
| Other analyses           | 17 | Report other analyses done—eg analyses of subgroups and interactions, and sensitivity analyses                                                                             | NA  |
| <b>Discussion</b>        |    |                                                                                                                                                                            |     |
| Key results              | 18 | Summarise key results with reference to study objectives                                                                                                                   | Yes |
| Limitations              | 19 | Discuss limitations of the study, taking into account sources of potential bias or imprecision. Discuss both direction and magnitude of any potential bias                 | Yes |
| Interpretation           | 20 | Give a cautious overall interpretation of results considering objectives, limitations, multiplicity of analyses, results from similar studies, and other relevant evidence | Yes |
| Generalisability         | 21 | Discuss the generalisability (external validity) of the study results                                                                                                      | Yes |
| <b>Other information</b> |    |                                                                                                                                                                            |     |
| Funding                  | 22 | Give the source of funding and the role of the funders for the present study and, if applicable, for the original study on which the present article is based              | Yes |

\*Give information separately for cases and controls in case-control studies and, if applicable, for exposed and unexposed groups in cohort and cross-sectional studies.

**Note:** An Explanation and Elaboration article discusses each checklist item and gives methodological background and published examples of transparent reporting. The STROBE checklist is best used in conjunction with this article (freely available on the Web sites of PLoS Medicine at <http://www.plosmedicine.org/>, Annals of Internal Medicine at <http://www.annals.org/>, and Epidemiology at <http://www.epidem.com/>). Information on the STROBE Initiative is available at [www.strobe-statement.org](http://www.strobe-statement.org).

# BMJ Open

## Cross-Sectional Associations of Sedentary Behavior and Physical Activity on Depression in Japanese Older Adults: An Isotemporal Substitution Approach.

|                                 |                                                                                                                                                                                                                                                                                                                                                                                                                                     |
|---------------------------------|-------------------------------------------------------------------------------------------------------------------------------------------------------------------------------------------------------------------------------------------------------------------------------------------------------------------------------------------------------------------------------------------------------------------------------------|
| Journal:                        | <i>BMJ Open</i>                                                                                                                                                                                                                                                                                                                                                                                                                     |
| Manuscript ID                   | bmjopen-2018-022282.R1                                                                                                                                                                                                                                                                                                                                                                                                              |
| Article Type:                   | Research                                                                                                                                                                                                                                                                                                                                                                                                                            |
| Date Submitted by the Author:   | 21-Jun-2018                                                                                                                                                                                                                                                                                                                                                                                                                         |
| Complete List of Authors:       | Yasunaga, Akitomo; Bunka Gakuen University, Faculty of Liberal Arts and Sciences<br>Shibata, Ai; University of Tsukuba, Faculty of Health and Sport Sciences<br>Ishii, Kaori; Waseda University, Faculty of Sport Sciences<br>Koohsari, Javad; Waseda University, Faculty of Sport Sciences; Baker Heart and Diabetes Institute, Behavioural Epidemiology Laboratory<br>OKA, Koichiro; Faculty of Sport Sciences, Waseda University |
| <b>Primary Subject Heading</b>: | Public health                                                                                                                                                                                                                                                                                                                                                                                                                       |
| Secondary Subject Heading:      | Sports and exercise medicine                                                                                                                                                                                                                                                                                                                                                                                                        |
| Keywords:                       | MENTAL HEALTH, PUBLIC HEALTH, PREVENTIVE MEDICINE, Depression & mood disorders < PSYCHIATRY                                                                                                                                                                                                                                                                                                                                         |
|                                 |                                                                                                                                                                                                                                                                                                                                                                                                                                     |

SCHOLARONE™  
Manuscripts

Only

1

**Title Page**

Title of the article:

Cross-Sectional Associations of Sedentary Behavior and Physical Activity on Depression in Japanese Older Adults: An Isotemporal Substitution Approach.

Akitomo Yasunaga<sup>1</sup>, Ai Shibata<sup>2</sup>, Kaori Ishii<sup>3</sup>, Mohammad Javad Koohsari<sup>3,4,5</sup>, and Koichiro Oka.<sup>3</sup>

<sup>1</sup> Faculty of Liberal Arts and Sciences, Bunka Gakuen University, Shibuya-ku, Tokyo, Japan

<sup>2</sup> Faculty Health and Sport Sciences, University of Tsukuba, Tsukuba, Japan

<sup>3</sup> Faculty of Sport Sciences, Waseda University, Tokorozawa, Japan

<sup>4</sup> Behavioural Epidemiology Laboratory, Baker Heart and Diabetes Institute, Melbourne, Australia

<sup>5</sup> Mary MacKillop Institute for Health Research, Australian Catholic University, Melbourne, Australia

Word count (excluding title page, abstract, references, and tables): 2645 words

References: 34

Tables: 2

Address for correspondence: Akitomo Yasunaga, Faculty of Liberal Arts and Sciences, Bunka Gakuen University, 3-22-1 Yoyogi, Shibuya-ku, Tokyo, Japan

Telephone and Fax number: +81-3-3299-2361 E-mail: yasunaga@bunka.ac.jp

## ABSTRACT

**Objectives** Reducing sedentary behavior (SB) and increasing physical activity (PA) have been shown to be associated with decreased depression. However, there are yet few studies examining the potential benefits on older adults' depression, when SB is replaced with PA. This study aimed to examine the associations of objectively-assessed SB, light-intensity PA (LPA), and moderate-to-vigorous PA (MVPA) with depression among a sample of Japanese older adults, and to explore impacts of substituting SB with PA on older adults' depression.

**Design** Cross-sectional analysis.

**Setting** General community.

**Participants** A total of 276 older adults aged 65–85 years living in Japan.

**Main outcome measures** Three behaviors including the average daily time spent in SB ( $\leq 1.5$  METs); LPA ( $>1.5$  to  $<3.0$  METs); and MVPA ( $\geq 3.0$  METs) per day were calculated by accelerometers. Depression was assessed using the Japanese version of the 15-item Geriatric Depression scale (GDS-15).

**Results** Less SB ( $\beta = 0.129$ , 95%CI 0.015 to 0.243) and more LPA ( $\beta = -0.138$ , 95%CI -0.265 to -0.011) were found to be significantly and negatively associated with the GDS-15 score in the single-activity model. The isotemporal substitution model found that replacing 30 minutes/day of SB with the same amount of LPA was significantly and negatively associated with the GDS-15 score ( $\beta = -0.131$ , 95%CI -0.260 to -0.002).

**Conclusions** These findings indicated that substituting even small amounts of SB with LPA may contribute to less depression in older adults. Potential favorable effects can be observed for replacing only 30 minutes per day of SB with LPA.

*Key words:* active behaviors, mental health, sitting time, objective measurements, aging.

3

**Article Summary****Strength and limitations of this study**

- The use of accelerometers to objectively measure participants' sedentary and active behaviors was the main strength of this study.

- We examined the impacts of substituting sedentary behavior with physical activity on older adults' depression by using the isotemporal substitution approach.

- As a cross-sectional study, we were unable to infer a cause-and-effect relationship between sedentary behavior, physical activity, and depressive symptoms.

## INTRODUCTION

Regular physical activity (PA), especially moderate-to-vigorous PA (MVPA) (e.g., exercise, sports, and brisk walking), has been found to be associated with less depression among older adults<sup>1,2</sup>. Recent studies have also demonstrated that sedentary behavior (SB) (e.g., television viewing, computer use, and sitting in cars) and light-intensity PA (LPA) (e.g., housework, gardening, and casual walking) are closely related to depression : less SB<sup>3</sup> and more LPA<sup>4</sup> were found to be favorably associated with older adults' depression.

Several recent studies have examined how replacing one activity with another (e.g., replacing SB with LPA or MVPA) can affect various health outcomes such as all-cause mortality and cardiovascular disease using the isothermal substitution (IS) approach<sup>5,6</sup>. For example, a cross-sectional study found the reallocation of 30 minutes/day of SB with equal time of sleep, or LPA, or MVPA to be associated with better cardiovascular risk biomarkers<sup>5</sup>. Another prospective study including a large sample of middle-aged and older adults found that replacing SB with same amount of standing, sleeping (in low sleepers only), walking, or MVPA were associated with the lowest mortality risk<sup>6</sup>. Thus, the IS approach enables researchers to simultaneously model a specific activity being performed and an activity being displaced in an equal time-exchange manner<sup>6</sup>. There are few previous studies examining the potential benefits on depression, when SB was replaced with LPA or MVPA<sup>7,8</sup>. For instance, a prospective study with 10 years follow-up among a large sample of US women found that replacing 60 minutes/day of television viewing time with the same amount of fast walking was associated with a lower depression<sup>7</sup>. Another study examining association between objectively-measured PA and depression demonstrated that replacing 30 minutes/day of SB



5

with LPA was associated with a lower depression<sup>8</sup>. However, one of these studies used self-reported measures of PA and SB<sup>7</sup>, which are subject to recall bias (i.e., lack of accuracy, validity, and reproducibility)<sup>9</sup> and two studies included middle- and older-aged people<sup>7,8</sup>. Hallgren et al. suggested that further research is needed to better understand the complex relationships between PA, SB, and depression<sup>10</sup>. It is not clear yet how replacing SB with PA may affect depression among a total sample of elderly people, especially among Asian older sample.

Therefore, this study aims to examine the associations of objectively-assessed SB, LPA, and MVPA with depression among a sample of Japanese older adults, and to explore impacts of substituting SB with PA on older adults' depression by using the IS approach.

## **METHODS**

### **Participants and Data Collection**

This study used cross-sectional data from a larger epidemiological study conducted in Matsudo city, Japan. A postal survey was sent to 3,000 residents aged 65-85 years who were randomly-selected from the registry of residential addresses. A total number of 349 participants (of 1,250 people who responded to the postal survey) attended in a sub-study, in which PA/SB were objectively calculated. Written informed consent was obtained from all participants.

### **Measurements**

Accelerometers (Active style Pro HJA-350IT, Omron Healthcare, Kyoto, Japan) were used to objectively measure participants' PA and SB. The detailed algorithm and validity of the

6

accelerometer device have been described elsewhere<sup>11-13</sup>. The device evaluates the intensity of activity by METs using a built-in algorithm. A previous study, in which METs for household and locomotive activities were calculated, reported a linear relationship between filtered synthetic accelerations with PA intensity<sup>12</sup>. Participants were guided to wear the accelerometer on their waist for at least 7 consecutive days—except when sleeping or during water-based activities. To be included in the study, participants needed to wear the accelerometer for  $\geq 4$  days (including 1 weekend day), with at least 10 hour/day of wear time each day<sup>14</sup>. Non-wear time was defined as at least consecutive 60 minutes of 0 cpm, with allowance for up to 2 min of some limited movement ( $< 50$  cpm)<sup>14</sup>. The daily average time spent on SB ( $\leq 1.5$  METs), LIPA ( $> 1.5$  to  $< 3.0$  METs) and MVPA ( $\geq 3.0$  METs) were calculated. These MET levels have been used by previous studies examining functional decline among older adults<sup>15,16</sup>.

Depression was assessed using the Japanese language version of the 15-item Geriatric Depression scale (GDS-15)<sup>17</sup>. GDS-15 questionnaire includes 15 questions about participants' feelings in the past week. For example, "Do you often get bored? Yes / No". The score ranges from 0 to 15 and higher scores indicated stronger depression tendency. The GDS-15 has been widely used to assess depression symptom among older adults all over the world. In this study, the reliability of the GDS-15 (Cranach's alpha) was 0.81.

The following individual-level variables were considered as covariates: gender, age, body mass index, physical function, marital status, and educational attainment. Body mass index was objectively calculated by measuring the participants' height and weight. Physical function was assessed using the Japanese language version of the Medical Outcomes Survey Short Form-8 questionnaire<sup>18</sup>.

## Statistical Analysis

7

We tested the assumption that replacing SB with PA on may contribute to better older adults' depression. Three multiple linear regression models including a single-activity, a partition, and an IS model were conducted to examine the associations of SB, LPA, and MVPA with depression. Since a 30 minutes was used as a unit for activity, the IS models assessed the effect of replacing a 30-minute of one activity with the equal time of another activity. Many previous studies using IS model have examined the effects of replacing a 30 minute<sup>5,8</sup> or a 60-minute<sup>6,7</sup> unit of SB with equal time of LPA or MVPA on various health outcomes. From the viewpoint of feasibility, replacing 60 minutes a day may be difficult for older adults<sup>19,20</sup>, therefore we chose the replacing 30 minutes in this study. The single-activity model analyzed each activity component separately (e.g., SB only), without considering the other activity types, adjusting for total wear time and confounders. The model (in the case of SB) is shown as follows:

The GDS-15 score = (b0) SB + (b3) total wear time + (b4) covariates.

The partition model analyzed all the activities simultaneously, without adjusting for total wear time. It is shown as below:

The GDS-15 score = (b0) SB + (b1) LPA + (b2) MVPA + (b4) covariates.

The coefficient for one type of activity represents the effect of increasing this type of activity while holding the other activities constant in this model. The model represents the effects of adding rather than substituting an activity type, because the total wear time is not included in the model (thus is not held constant).

The IS model assessed the effect of substituting one activity type with another for the equal amount of time (e.g., replacing LPA with SB, by removing SB from the model). The IS model (in the case of omitting SB from the model) is shown as follows:

The GDS-15 score = (b1) LPA + (b2) MVPA + (b3) total wear time + (b4) covariates.

The coefficients b1 and b2 in this model represent the effect of a 30 minutes

8

substitution of SB with one of the activity types (LPA, or MVPA), while holding the other activity types and total wear time constant. For instance,  $b_1$  can be interpreted as the effect of replacing SB with LPA for 30 minutes, while holding MVPA and total wear time constant.

All analyses were conducted using IBM SPSS Statistics 20.0 for Windows (IBM Japan Corp., Tokyo, Japan), and the level of significance was set at  $p < 0.05$ .

### **Patient and Public Involvement statement**

Patients and public were not involved in developing the hypothesis, the specific aims or the research questions, nor were they involved in developing plans for design or implementation of the study.

### **RESULTS**

Of 349 participants, data from 276 participants (171 men, 105 women) were analyzed after excluding those with missing data; missing depression (4%) and covariates (0 to 3.7%) and lacking valid PA accelerometer data (12.6%).

Table 1 shows the characteristics of study participants. The mean number of valid days of participant's wearing accelerometer was 7.2 days (SD = 0.9). On average, participants wore accelerometers for 15 hours/day, and the mean proportion of SB, LPA, and MVPA times to total accelerometer wearing time were 58%, 36%, and 6%, respectively. Correlation coefficients were  $-0.68$  between SB and LPA,  $-0.34$  between SB and MVPA, and  $0.21$  between LPA and MVPA. Table 2 shows the results for the single activity, partition, and IS models with adjusting for covariates. The single-activity model shows that LPA was significantly and favorably associated with the GDS-15 score ( $\beta = -.138, p < .05$ ), and SB

9

1  
2  
3 was significantly and positively associated with the GDS-15 score ( $\beta = .129, p < .05$ ). The  
4  
5  
6 partition model showed no significant associations between all activities with the GDS-15  
7  
8 score. The IS model showed that a 30-minutes unit of SB replaced with LPA to be  
9  
10 significantly and negatively associated with the GDS-15 score ( $\beta = -.131, p < .05$ ).  
11  
12  
13  
14

## 15 **DISCUSSION**

16  
17 This study examined how objectively-measured SB, LPA, and MVPA are associated with  
18  
19 depression among Japanese older adults, and how replacing these behaviors may influence  
20  
21 depression. Although many studies suggested that PA has favorable effects on depression in  
22  
23 both clinical and non-clinical population<sup>21-23</sup>, there is currently no consensus regarding the  
24  
25 optimal amount of PA needed to treat depression<sup>10</sup>. We found less SB and more LPA to be  
26  
27 negatively associated with older adults' depression in a single-activity model (including total  
28  
29 time held constant). Our findings are consistent with some recent studies that demonstrated  
30  
31 the favorable effects of LPA or reducing SB on depression for older adults<sup>4,24,25</sup>.  
32  
33  
34  
35  
36  
37

38 In contrast with some previous studies<sup>26</sup>, we did not find any favorable effects of  
39  
40 MVPA on depression in the three multiple linear regression models. This may be because of  
41  
42 the age group (older adults), which was targeted in the current study. While relatively  
43  
44 consistent effects of MVPA on depression among children and adults were reported by  
45  
46 previous studies<sup>26</sup>, there are mixed findings among older adults<sup>27</sup>. For example, a  
47  
48 randomized controlled trial study with a large sample aged 18 to 71 years reported that the  
49  
50 mean reduction in depression scores were significantly larger in the physical exercise and  
51  
52 internet-based cognitive-behavioral therapy groups compared with treatment as usual<sup>28,29</sup>.  
53  
54  
55 Furthermore, they compared the effects of different exercise intensities on post-treatment  
56  
57  
58  
59  
60

10

1  
2  
3 depression severity and found although there were no significant differences among light  
4 exercise, moderate-exercise, and vigorous exercise groups at post-treatment; the light  
5 exercise group reduced their depression score more than the moderate and vigorous exercise  
6 groups<sup>30</sup>. Jung et al. found that LPA was favorably associated with preventing depressive  
7 symptoms among older adults, but MVPA was not<sup>27</sup>. Nevertheless, our findings showed that  
8 replacing SB with LPA had beneficial effects on older adults' depression. We found that  
9 replacing only 30 minutes of SB with equal time of LPA during one day was associated with  
10 approximately 5% less depression score. Since our participants were relatively healthy, we  
11 did not consider the clinical meaning of decreasing depression score. However, a 5%  
12 reduction in depression score leads to 14 out of 62 people with a depression tendency (GDS  
13 score is over 5 point) return to normal range (GDS score is from 0 to 4 point). Currently, the  
14 evidence-based for the prescription of different PA and exercise intensities for depression is  
15 weak<sup>30</sup>. For older adults including physical frail people, however, our results may suggest  
16 that it will be effective to reduce SB time and increase LPA that accounts for a large  
17 proportion of activities in daily life in order to decrease depression. Among older adults, it  
18 may be more practical to increase 30 minutes of LPA per day compared with MVPA.

19  
20  
21  
22  
23  
24  
25  
26  
27  
28  
29  
30  
31  
32  
33  
34  
35  
36  
37  
38 This study has some limitations. The cause-and-effect relationship between SB, PA,  
39 and depression cannot be inferred from a cross-sectional study like ours. In addition, our  
40 findings may not be generalizable to the Japanese population, as relatively healthy, active,  
41 and well educated older adults appeared to have participated in this study. Thus, we suggest  
42 future intervention studies such as randomized controlled trial studies, using more  
43 participants and including frailer individuals, are needed in order to provide a more definitive  
44 interpretation of the present findings. Further, the context and type of SB was not assessed in  
45 this study. SB consists of different types: passive sedentary time (e.g. TV viewing and just  
46 sitting) and mentally-active sedentary time (e.g., computer and reading)<sup>31,32</sup>. Several recent  
47  
48  
49  
50  
51  
52  
53  
54  
55  
56  
57  
58  
59  
60

11

1  
2  
3 studies have shown that these different types of SB may be differently associated with health  
4  
5 outcomes including mental health<sup>31,33</sup>. Such a co-existence of different types of SB may play  
6  
7 a role in the observed associations in this study. Further research is needed to explore the  
8  
9 effects of replacing different types of SB with LPA and MVPA on depression symptoms. In  
10  
11 addition, previous PA levels and exercise participation of participants (i.e. the amount of PA  
12  
13 in the past 12 months) were not considered in this study. It is likely that previous amount of  
14  
15 PA may affect the current depression status<sup>34</sup>. It is necessary to consider this point in further  
16  
17 research. The strength of this study is the use of accelerometers to objectively measure  
18  
19 participants' sedentary and active behaviors.  
20  
21  
22  
23  
24

## 25 **CONCLUSION**

26  
27 Our findings indicated that replacing even small amounts of SB (e.g. watching TV and  
28  
29 working at a desk) with LPA (e.g. indoor house-work and slow walking) are associated with  
30  
31 less depression among older adults. Potential favorable effects were identified for replacing  
32  
33 only 30 minutes per day of SB with LPA. These findings are useful in promoting mental  
34  
35 health among older adults with better compliance, lower risk of injuries, and long-term  
36  
37 sustainability  
38  
39  
40  
41  
42

## 43 **Acknoulege**

44  
45 None.  
46  
47  
48

## 49 **Contributers**

50  
51 All authors contributed equally to this work. Oka: Study concept and design. Yasunaga,  
52  
53 Shibata, Ishii, and Oka: Data analysis and interpretation and Statistical analysis. Yasunaga  
54  
55 and Koohsari: Drafting of manuscript. Yasunaga, Koohsari, and Oka: Critical revision of  
56  
57  
58  
59

12

manuscript for intellectual content, final approval of version to be published.

### **Funding**

Yasunaga was supported by the JSPS KAKENHI Grant (#15K01534). Shibata was supported the JSPS KAKENHI Grant (#15K01647). Koohsari was supported by the JSPS Postdoctoral Fellowship for Research in Japan (#17716). Oka was supported by the MEXT-Supported Program for the Strategic Research Foundation at Private Universities, 2015-2019 the Japan Ministry of Education, Culture, Sports, Science and Technology (S1511017).

### **Competing interest**

None declared.

### **Ethics approval**

The study was approved by the Waseda University Institutional Committee on Human Research (2013-265), and the Institutional Review Board of Chiba Prefectural University of Health Sciences (2012-042).

### **Data sharing statement**

No additional data sharing available.

### **REFERENCES**

1. Nelson ME, Rejeski WJ, Blair SN, et al. Physical activity and public health in older adults: recommendation from the American College of Sports Medicine and the American Heart Association. *Circulation* 2007;116:1094-105.



13

2. Netz Y, Wu MJ, Becker BJ, et al. Physical activity and psychological well-being in advanced age: a meta-analysis of intervention studies. *Psychol Aging* 2005;20:272-84.
3. Hamer M, Stamatakis E. Prospective study of sedentary behavior, risk of depression, and cognitive impairment. *Med Sci Sports Exerc* 2014;46:718-23.
4. Loprinzi PD. Objectively measured light and moderate-to-vigorous physical activity is associated with lower depression levels among older US adults. *Aging Ment Health* 2013;17:801-5.
5. Buman MP, Winkler EA, Kurka JM, et al. Reallocating time to sleep, sedentary behaviors, or active behaviors: associations with cardiovascular disease risk biomarkers, NHANES 2005-2006. *Am J Epidemiol* 2014;179:323-34.
6. Stamatakis E, Rogers K, Ding D, et al. All-cause mortality effects of replacing sedentary time with physical activity and sleeping using an isotemporal substitution model: a prospective study of 201,129 mid-aged and older adults. *Int J Behav Nutr Phys Act* 2015;12:121.
7. Mekary RA, Lucas M, Pan A, et al. Isotemporal substitution analysis for physical activity, television watching, and risk of depression. *Am J Epidemiol* 2013;178:474-83.
8. Dillon CB, McMahon E, O'Regan G, et al. Associations between physical behaviour patterns and levels of depressive symptoms, anxiety and well-being in middle-aged adults: a cross-sectional study using isotemporal substitution models. *BMJ Open* 2018;8:e018978.
9. Stewart AL, Mills KM, King AC, et al. CHAMPS physical activity questionnaire for older adults: outcomes for interventions. *Med Sci Sports Exerc* 2001;33:1126-41.
10. Hallgren M, Herring MP, Owen N, et al. Exercise, Physical activity, and sedentary behavior in the treatment of depression: Broadening the scientific perspectives and clinical opportunities. *Front Psychiatry* 2016;7:36.

14

11. Kurita S, Yano S, Ishii K, et al. Comparability of activity monitors used in Asian and Western-country studies for assessing free-living sedentary behaviour. *PLoS One* 2017;12:e0186523.
12. Ohkawara K, Oshima Y, Hikiyama Y, et al. Real-time estimation of daily physical activity intensity by a triaxial accelerometer and a gravity-removal classification algorithm. *Br J Nutr* 2011;105:1681-91.
13. Oshima Y, Kawaguchi K, Tanaka S, et al. Classifying household and locomotive activities using a triaxial accelerometer. *Gait Posture* 2010;31:370-4.
14. Healy GN, Matthews CE, Dunstan DW, et al. Sedentary time and cardio-metabolic biomarkers in US adults: NHANES 2003-06. *Eur Heart J* 2011;32:590-7.
15. Blair CK, Morey MC, Desmond RA, et al. Light-intensity activity attenuates functional decline in older cancer survivors. *Med Sci Sports Exerc* 2014;46:1375-83.
16. Chmelo E, Nicklas B, Davis C, et al. Physical activity and physical function in older adults with knee osteoarthritis. *J Phys Act Health* 2013;10:777-83.
17. Niino N, Imaizumi T, Kawakami N. A Japanese translation of the Geriatric Depression Scale. *Clin Gerontol* 1991;10:85-7.
18. Fukuhara S, Suzukamo Y. Manual of the SF-8 Japanese Version. Kyoto: *Institute for Health Outcome & Process Evaluation Research*; 2004.
19. Fitzsimons CF, Kirk A, Baker G, et al. Using an individualised consultation and activPAL feedback to reduce sedentary time in older Scottish adults: results of a feasibility and pilot study. *Prev Med* 2013;57:718-20.
20. Gardiner PA, Eakin EG, Healy GN, et al. Feasibility of reducing older adults' sedentary time. *Am J Prev Med* 2011;41:174-7.

15

21. Rebar AL, Stanton R, Geard D, et al. A meta-meta-analysis of the effect of physical activity on depression and anxiety in non-clinical adult populations. *Health Psychol Rev* 2015;9:366-78.
22. Cooney GM, Dwan K, Greig CA, et al. Exercise for depression. *Cochrane Database Syst Rev* 2013;12:CD004366.
23. Fukukawa Y, Nakashima C, Tsuboi S, et al. Age differences in the effect of physical activity on depressive symptoms. *Psychol Aging* 2004;19:346-51.
24. Tse AC, Wong TW, Lee PH. Effect of Low-intensity exercise on physical and cognitive health in older adults: a systematic review. *Sports Med Open* 2015;1:37.
25. Zhai L, Zhang Y, Zhang D. Sedentary behaviour and the risk of depression: a meta-analysis. *Br J Sports Med* 2015;49:705-9.
26. Dore I, O'Loughlin JL, Beauchamp G, et al. Volume and social context of physical activity in association with mental health, anxiety and depression among youth. *Prev Med* 2016;91:344-50.
27. Jung S, Lee S, Lee S, et al. Relationship between physical activity levels and depressive symptoms in community-dwelling older Japanese adults. *Geriatr Gerontol Int* 2018;18:421-7.
28. Hallgren M, Kraepelien M, Ojehagen A, et al. Physical exercise and internet-based cognitive-behavioural therapy in the treatment of depression: randomised controlled trial. *Br J Psychiatry* 2015;207:227-34.
29. Hallgren M, Helgadottir B, Herring MP, et al. Exercise and internet-based cognitive-behavioural therapy for depression: multicentre randomised controlled trial with 12-month follow-up. *Br J Psychiatry* 2016;209:414-20.
30. Helgadottir B, Hallgren M, Ekblom O et al. Training fast or slow? Exercise for depression: A randomized controlled trial. *Prev Med* 2016;91:123-31.

16

- 1  
2  
3  
4  
5  
6  
7  
8  
9  
10  
11  
12  
13  
14  
15  
16  
17  
18  
19  
20  
21  
22  
23  
24  
25  
26  
27  
28  
29  
30  
31  
32  
33  
34  
35  
36  
37  
38  
39  
40  
41  
42  
43  
44  
45  
46  
47  
48  
49  
50  
51  
52  
53  
54  
55  
56  
57  
58  
59  
60
31. Kikuchi H, Inoue S, Sugiyama T, et al. Distinct associations of different sedentary behaviors with health-related attributes among older adults. *Prev Med* 2014;67:335-9.
32. Wullems JA, Verschueren SM, Degens H, et al. A review of the assessment and prevalence of sedentarism in older adults, its physiology/health impact and non-exercise mobility counter-measures. *Biogerontology* 2016;17:547-65.
33. Kesse-Guyot E, Charreire H, Andreeva VA, et al. Cross-sectional and longitudinal associations of different sedentary behaviors with cognitive performance in older adults. *PLoS One* 2012;7:e47831.
34. Yoshiuchi K, Nakahara R, Kumano H, et al. Yearlong physical activity and depressive symptoms in older Japanese adults: cross-sectional data from the Nakanojo study. *Am J Geriatr Psychiatry* 2006;14:621-4.

Table 1. Characteristics of study participants

|                                                                              | n or M (SD), % |       |
|------------------------------------------------------------------------------|----------------|-------|
| Gender                                                                       |                |       |
| <i>Women</i>                                                                 | 105            | 38.0% |
| Age (years)                                                                  | 74.4           | 5.3   |
| Body mass index (kg/m <sup>2</sup> )                                         | 23.5           | 3.2   |
| Physical function                                                            | 49.7           | 5.3   |
| Marital status                                                               |                |       |
| <i>Married</i>                                                               | 228            | 82.6% |
| Educational attainment                                                       |                |       |
| <i>University, junior college, vocational school, or higher-level degree</i> | 109            | 39.5% |
| Total accelerometer wear time (min/day)                                      | 902.9          | 86.7  |
| SB (min/day)                                                                 | 524.6          | 113.3 |
| LPA (min/day)                                                                | 328.8          | 101.3 |
| MVPA (min/day)                                                               | 50.0           | 32.8  |
| GDS-15 score                                                                 | 2.8            | 3.0   |

*Note.* SB=Sedentary behavior, LPA=Light-intensity physical activity, MVPA= Moderate-to-vigorous physical activity, GDS-15 = the 15-item Geriatric Depression scale.

Table 2. The associations of SB, LPA, and MVPA with depression

|                       | SB      |                 | LPA     |                   | MVPA    |                 |
|-----------------------|---------|-----------------|---------|-------------------|---------|-----------------|
|                       | $\beta$ | 95%CI           | $\beta$ | 95%CI             | $\beta$ | 95%CI           |
| Single-activity model | 0.129   | (0.015, 0.243)* | -0.138  | (-0.265, -0.011)* | -0.173  | (-0.530, 0.184) |
| Partition model       | 0.101   | (-0.031, 0.233) | -0.030  | (-0.184, 0.124)   | -0.011  | (-0.390, 0.367) |
| Isotemporal model     |         |                 |         |                   |         |                 |
| Replace SB with       |         | Dropped         | -0.131  | (-0.260, -0.002)* | -0.113  | (-0.473, 0.247) |
| Replace LPA with      | 0.132   | (0.003, 0.261)* |         | Dropped           | 0.020   | (-0.383, 0.422) |
| Replace MVPA with     | 0.118   | (-0.242, 0.477) | -0.013  | (-0.395, 0.361)   |         | Dropped         |

*Note.* SB=Sedentary behavior, LPA=Light-intensity physical activity, MVPA=Moderate-to-vigorous physical activity,  $\beta$ = Regression coefficients correspond to a 30-minutes increment of each activity, CI= Confidence intervals, \*  $p < 0.05$ .

All models adjusted for gender, age, body mass index, physical function, marital status, educational attainment, and total accelerometer wear time.

| Item                         | #  | Recommendation                                                                                                                                                                                                                                                                                                                                                                                                                                                         | Response                                                          |
|------------------------------|----|------------------------------------------------------------------------------------------------------------------------------------------------------------------------------------------------------------------------------------------------------------------------------------------------------------------------------------------------------------------------------------------------------------------------------------------------------------------------|-------------------------------------------------------------------|
| <b>Title and Abstract</b>    | 1  | (a) Indicate the study's design with a commonly used term in the title or the abstract                                                                                                                                                                                                                                                                                                                                                                                 | Yes (see page 1 and 2; <i>Title Page and Abstract</i> )           |
|                              |    | (b) Provide in the abstract an informative and balanced summary of what was done and what was found                                                                                                                                                                                                                                                                                                                                                                    | Yes (see page 2; <i>Abstract</i> )                                |
| <b>Introduction</b>          |    |                                                                                                                                                                                                                                                                                                                                                                                                                                                                        |                                                                   |
| Background/rationale         | 2  | Explain the scientific background and rationale for the investigation being reported                                                                                                                                                                                                                                                                                                                                                                                   | Yes (see page 4-5; <i>Introduction</i> )                          |
| Objectives                   | 3  | State specific objectives, including any prespecified hypotheses                                                                                                                                                                                                                                                                                                                                                                                                       | Yes (see page 5; <i>Introduction</i> )                            |
| <b>Methods</b>               |    |                                                                                                                                                                                                                                                                                                                                                                                                                                                                        |                                                                   |
| Study design                 | 4  | Present key elements of study design early in the paper                                                                                                                                                                                                                                                                                                                                                                                                                | Yes (see page 6-7; <i>Statistical Analysis</i> )                  |
| Setting                      | 5  | Describe the setting, locations, and relevant dates, including periods of recruitment, exposure, follow-up, and data collection                                                                                                                                                                                                                                                                                                                                        | Yes (see page 5; <i>Participants and Data Collection</i> )        |
| Participants                 | 6  | (a) <i>Cohort study</i> —Give the eligibility criteria, and the sources and methods of selection of participants. Describe methods of follow-up<br><i>Case-control study</i> —Give the eligibility criteria, and the sources and methods of case ascertainment and control selection. Give the rationale for the choice of cases and controls<br><i>Cross-sectional study</i> —Give the eligibility criteria, and the sources and methods of selection of participants | Yes (see page 5; <i>Participants and Data Collection</i> )        |
|                              |    | (b) <i>Cohort study</i> —For matched studies, give matching criteria and number of exposed and unexposed<br><i>Case-control study</i> —For matched studies, give matching criteria and the number of controls per case                                                                                                                                                                                                                                                 | NA                                                                |
| Variables                    | 7  | Clearly define all outcomes, exposures, predictors, potential confounders, and effect modifiers. Give diagnostic criteria, if applicable                                                                                                                                                                                                                                                                                                                               | Yes (see page 5-6; <i>Measurements</i> )                          |
| Data sources/<br>measurement | 8* | For each variable of interest, give sources of data and details of methods of assessment (measurement). Describe comparability of assessment methods if there is more than one group                                                                                                                                                                                                                                                                                   | Yes (see page 5-6; <i>Measurements</i> )                          |
| Bias                         | 9  | Describe any efforts to address potential sources of bias                                                                                                                                                                                                                                                                                                                                                                                                              | Yes (see page 8; "Results" for the list of excluded participants) |
| Study size                   | 10 | Explain how the study size was arrived at                                                                                                                                                                                                                                                                                                                                                                                                                              | This is a secondary analysis of a study                           |

|                        |     |                                                                                                                                                                                                                                                                                                           |                                                                                           |
|------------------------|-----|-----------------------------------------------------------------------------------------------------------------------------------------------------------------------------------------------------------------------------------------------------------------------------------------------------------|-------------------------------------------------------------------------------------------|
| Quantitative variables | 11  | Explain how quantitative variables were handled in the analyses. If applicable, describe which groupings were chosen and why                                                                                                                                                                              | Yes (see page 6-7; <i>Statistical Analysis</i> )                                          |
| Statistical methods    | 12  | (a) Describe all statistical methods, including those used to control for confounding                                                                                                                                                                                                                     | Yes (see page 6-7; <i>Statistical Analysis</i> )                                          |
|                        |     | (b) Describe any methods used to examine subgroups and interactions                                                                                                                                                                                                                                       | Yes (see page 6-7; <i>Statistical Analysis</i> )                                          |
|                        |     | (c) Explain how missing data were addressed                                                                                                                                                                                                                                                               | Yes (see page 8; <i>Results</i> )                                                         |
|                        |     | (d) <i>Cohort study</i> —If applicable, explain how loss to follow-up was addressed<br><i>Case-control study</i> —If applicable, explain how matching of cases and controls was addressed<br><i>Cross-sectional study</i> —If applicable, describe analytical methods taking account of sampling strategy | NA                                                                                        |
|                        |     | (e) Describe any sensitivity analyses                                                                                                                                                                                                                                                                     | NA                                                                                        |
| <b>Results</b>         |     |                                                                                                                                                                                                                                                                                                           |                                                                                           |
| Participants           | 13* | (a) Report numbers of individuals at each stage of study—eg numbers potentially eligible, examined for eligibility, confirmed eligible, included in the study, completing follow-up, and analysed                                                                                                         | Yes (see page 8; <i>Results</i> )                                                         |
|                        |     | (b) Give reasons for non-participation at each stage                                                                                                                                                                                                                                                      | NA                                                                                        |
|                        |     | (c) Consider use of a flow diagram                                                                                                                                                                                                                                                                        | This is not a complicated study. We think that text explanation is sufficient.            |
| Descriptive data       | 14* | (a) Give characteristics of study participants (eg demographic, clinical, social) and information on exposures and potential confounders                                                                                                                                                                  | Yes (see page 16; <i>Table 1</i> )                                                        |
|                        |     | (b) Indicate number of participants with missing data for each variable of interest                                                                                                                                                                                                                       | Yes (see page 8; <i>Results</i> )                                                         |
|                        |     | (c) <i>Cohort study</i> —Summarise follow-up time (eg, average and total amount)                                                                                                                                                                                                                          | NA                                                                                        |
| Outcome data           | 15* | <i>Cohort study</i> —Report numbers of outcome events or summary measures over time                                                                                                                                                                                                                       | NA                                                                                        |
|                        |     | <i>Case-control study</i> —Report numbers in each exposure category, or summary measures of exposure                                                                                                                                                                                                      | NA                                                                                        |
|                        |     | <i>Cross-sectional study</i> —Report numbers of outcome events or summary measures                                                                                                                                                                                                                        | Yes (see page 16; <i>Table 1</i> )                                                        |
| Main results           | 16  | (a) Give unadjusted estimates and, if applicable, confounder-adjusted estimates and their precision (eg, 95% confidence interval). Make clear which confounders were adjusted for and why they were included                                                                                              | We reported only the adjusted estimates in order not to inflate the results with too many |



|                          |    |                                                                                                                                                                            |                                          |
|--------------------------|----|----------------------------------------------------------------------------------------------------------------------------------------------------------------------------|------------------------------------------|
|                          |    |                                                                                                                                                                            | estimates.                               |
|                          |    | (b) Report category boundaries when continuous variables were categorized                                                                                                  | NA                                       |
|                          |    | (c) If relevant, consider translating estimates of relative risk into absolute risk for a meaningful time period                                                           | NA                                       |
| Other analyses           | 17 | Report other analyses done—eg analyses of subgroups and interactions, and sensitivity analyses                                                                             | NA                                       |
| <b>Discussion</b>        |    |                                                                                                                                                                            |                                          |
| Key results              | 18 | Summarise key results with reference to study objectives                                                                                                                   | Yes (see page 11; <i>Conclusion</i> )    |
| Limitations              | 19 | Discuss limitations of the study, taking into account sources of potential bias or imprecision. Discuss both direction and magnitude of any potential bias                 | Yes (see page 10-11; <i>Discussion</i> ) |
| Interpretation           | 20 | Give a cautious overall interpretation of results considering objectives, limitations, multiplicity of analyses, results from similar studies, and other relevant evidence | Yes (see page 10-11; <i>Discussion</i> ) |
| Generalisability         | 21 | Discuss the generalisability (external validity) of the study results                                                                                                      | Yes (see page 10-11; <i>Discussion</i> ) |
| <b>Other information</b> |    |                                                                                                                                                                            |                                          |
| Funding                  | 22 | Give the source of funding and the role of the funders for the present study and, if applicable, for the original study on which the present article is based              | Yes (see page 11-12; <i>Funding</i> )    |

\*Give information separately for cases and controls in case-control studies and, if applicable, for exposed and unexposed groups in cohort and cross-sectional studies.

**Note:** An Explanation and Elaboration article discusses each checklist item and gives methodological background and published examples of transparent reporting. The STROBE checklist is best used in conjunction with this article (freely available on the Web sites of PLoS Medicine at <http://www.plosmedicine.org/>, Annals of Internal Medicine at <http://www.annals.org/>, and Epidemiology at <http://www.epidem.com/>). Information on the STROBE Initiative is available at [www.strobe-statement.org](http://www.strobe-statement.org).

# BMJ Open

## Cross-Sectional Associations of Sedentary Behavior and Physical Activity on Depression in Japanese Older Adults: An Isotemporal Substitution Approach.

|                                 |                                                                                                                                                                                                                                                                                                                                                                                                                                     |
|---------------------------------|-------------------------------------------------------------------------------------------------------------------------------------------------------------------------------------------------------------------------------------------------------------------------------------------------------------------------------------------------------------------------------------------------------------------------------------|
| Journal:                        | <i>BMJ Open</i>                                                                                                                                                                                                                                                                                                                                                                                                                     |
| Manuscript ID                   | bmjopen-2018-022282.R2                                                                                                                                                                                                                                                                                                                                                                                                              |
| Article Type:                   | Research                                                                                                                                                                                                                                                                                                                                                                                                                            |
| Date Submitted by the Author:   | 23-Jul-2018                                                                                                                                                                                                                                                                                                                                                                                                                         |
| Complete List of Authors:       | Yasunaga, Akitomo; Bunka Gakuen University, Faculty of Liberal Arts and Sciences<br>Shibata, Ai; University of Tsukuba, Faculty of Health and Sport Sciences<br>Ishii, Kaori; Waseda University, Faculty of Sport Sciences<br>Koohsari, Javad; Waseda University, Faculty of Sport Sciences; Baker Heart and Diabetes Institute, Behavioural Epidemiology Laboratory<br>OKA, Koichiro; Faculty of Sport Sciences, Waseda University |
| <b>Primary Subject Heading</b>: | Public health                                                                                                                                                                                                                                                                                                                                                                                                                       |
| Secondary Subject Heading:      | Sports and exercise medicine                                                                                                                                                                                                                                                                                                                                                                                                        |
| Keywords:                       | MENTAL HEALTH, PUBLIC HEALTH, PREVENTIVE MEDICINE, Depression & mood disorders < PSYCHIATRY                                                                                                                                                                                                                                                                                                                                         |
|                                 |                                                                                                                                                                                                                                                                                                                                                                                                                                     |

SCHOLARONE™  
Manuscripts

Only

1

**Title Page**

Title of the article:

Cross-Sectional Associations of Sedentary Behavior and Physical Activity on Depression in Japanese Older Adults: An Isotemporal Substitution Approach.

Akitomo Yasunaga<sup>1</sup>, Ai Shibata<sup>2</sup>, Kaori Ishii<sup>3</sup>, Mohammad Javad Koohsari<sup>3,4,5</sup>, and Koichiro Oka.<sup>3</sup>

<sup>1</sup> Faculty of Liberal Arts and Sciences, Bunka Gakuen University, Shibuya-ku, Tokyo, Japan

<sup>2</sup> Faculty Health and Sport Sciences, University of Tsukuba, Tsukuba, Japan

<sup>3</sup> Faculty of Sport Sciences, Waseda University, Tokorozawa, Japan

<sup>4</sup> Behavioural Epidemiology Laboratory, Baker Heart and Diabetes Institute, Melbourne, Australia

<sup>5</sup> Mary MacKillop Institute for Health Research, Australian Catholic University, Melbourne, Australia

Word count (excluding title page, abstract, references, and tables): 2645 words

References: 34

Tables: 2

Address for correspondence: Akitomo Yasunaga, Faculty of Liberal Arts and Sciences, Bunka Gakuen University, 3-22-1 Yoyogi, Shibuya-ku, Tokyo, Japan

Telephone and Fax number: +81-3-3299-2361 E-mail: yasunaga@bunka.ac.jp

2

**ABSTRACT**

**Objectives** Reducing sedentary behavior (SB) and increasing physical activity (PA) have been shown to be associated with decreased depression. However, there are yet few studies examining the potential benefits on older adults' depression, when SB is replaced with PA. This study aimed to examine the associations of objectively-assessed SB, light-intensity PA (LPA), and moderate-to-vigorous PA (MVPA) with depression among a sample of Japanese older adults, and to explore impacts of substituting SB with PA on older adults' depression.

**Design** Cross-sectional analysis.

**Setting** General community.

**Participants** A total of 276 older adults aged 65–85 years living in Japan.

**Main outcome measures** Three behaviors including the average daily time spent in SB ( $\leq 1.5$  METs); LPA ( $>1.5$  to  $<3.0$  METs); and MVPA ( $\geq 3.0$  METs) per day were calculated by accelerometers. Depression was assessed using the Japanese version of the 15-item Geriatric Depression scale (GDS-15).

**Results** Less SB ( $\beta = 0.129$ , 95%CI 0.015 to 0.243) and more LPA ( $\beta = -0.138$ , 95%CI -0.265 to -0.011) were found to be significantly and negatively associated with the GDS-15 score in the single-activity model. The isotemporal substitution model found that replacing 30 minutes/day of SB with the same amount of LPA was significantly and negatively associated with the GDS-15 score ( $\beta = -0.131$ , 95%CI -0.260 to -0.002).

**Conclusions** These findings indicated that substituting even small amounts of SB with LPA may contribute to less depression in older adults. Potential favorable effects can be observed for replacing only 30 minutes per day of SB with LPA.

*Key words:* active behaviors, mental health, sitting time, objective measurements, aging.

3

**Article Summary****Strength and limitations of this study**

- The use of accelerometers to objectively measure participants' sedentary and active behaviors was the main strength of this study.

- We examined the impacts of substituting sedentary behavior with physical activity on older adults' depression by using the isotemporal substitution approach.

- As a cross-sectional study, we were unable to infer a cause-and-effect relationship between sedentary behavior, physical activity, and depressive symptoms.

## INTRODUCTION

Regular physical activity (PA), especially moderate-to-vigorous PA (MVPA) (e.g., exercise, sports, and brisk walking), has been found to be associated with less depression among older adults<sup>1,2</sup>. Recent studies have also demonstrated that sedentary behavior (SB) (e.g., television viewing, computer use, and sitting in cars) and light-intensity PA (LPA) (e.g., housework, gardening, and casual walking) are closely related to depression : less SB<sup>3</sup> and more LPA<sup>4</sup> were found to be favorably associated with older adults' depression.

Several recent studies have examined how replacing one activity with another (e.g., replacing SB with LPA or MVPA) can affect various health outcomes such as all-cause mortality and cardiovascular disease using the isothermal substitution (IS) approach<sup>5,6</sup>. For example, a cross-sectional study found the reallocation of 30 minutes/day of SB with equal time of sleep, or LPA, or MVPA to be associated with better cardiovascular risk biomarkers<sup>5</sup>. Another prospective study including a large sample of middle-aged and older adults found that replacing SB with same amount of standing, sleeping (in low sleepers only), walking, or MVPA were associated with the lowest mortality risk<sup>6</sup>. Thus, the IS approach enables researchers to simultaneously model a specific activity being performed and an activity being displaced in an equal time-exchange manner<sup>6</sup>. There are few previous studies examining the potential benefits on depression, when SB was replaced with LPA or MVPA<sup>7,8</sup>. For instance, a prospective study with 10 years follow-up among a large sample of US women found that replacing 60 minutes/day of television viewing time with the same amount of fast walking was associated with a lower depression<sup>7</sup>. Another study examining association between objectively-measured PA and depression demonstrated that replacing 30 minutes/day of SB

5

with LPA was associated with a lower depression<sup>8</sup>. However, one of these studies used self-reported measures of PA and SB<sup>7</sup>, which are subject to recall bias (i.e., lack of accuracy, validity, and reproducibility)<sup>9</sup> and two studies included middle- and older-aged people<sup>7,8</sup>. Hallgren et al. suggested that further research is needed to better understand the complex relationships between PA, SB, and depression<sup>10</sup>. It is not clear yet how replacing SB with PA may affect depression among a total sample of elderly people, especially among Asian older sample.

Therefore, this study aims to examine the associations of objectively-assessed SB, LPA, and MVPA with depression among a sample of Japanese older adults, and to explore impacts of substituting SB with PA on older adults' depression by using the IS approach.

## **METHODS**

### **Participants and Data Collection**

This study used cross-sectional data from a larger epidemiological study conducted in Matsudo city, Japan. A postal survey was sent to 3,000 residents aged 65-85 years who were randomly-selected from the registry of residential addresses. A total number of 349 participants (of 1,250 people who responded to the postal survey) attended in a sub-study, in which PA/SB were objectively calculated. Written informed consent was obtained from all participants.

### **Measurements**

Accelerometers (Active style Pro HJA-350IT, Omron Healthcare, Kyoto, Japan) were used to objectively measure participants' PA and SB. The detailed algorithm and validity of the

6

accelerometer device have been described elsewhere<sup>11-13</sup>. The device evaluates the intensity of activity by METs using a built-in algorithm. A previous study, in which METs for household and locomotive activities were calculated, reported a linear relationship between filtered synthetic accelerations with PA intensity<sup>12</sup>. Participants were guided to wear the accelerometer on their waist for at least 7 consecutive days—except when sleeping or during water-based activities. To be included in the study, participants needed to wear the accelerometer for  $\geq 4$  days (including 1 weekend day), with at least 10 hour/day of wear time each day<sup>14</sup>. Non-wear time was defined as at least consecutive 60 minutes of 0 cpm, with allowance for up to 2 min of some limited movement ( $< 50$  cpm)<sup>14</sup>. The daily average time spent on SB ( $\leq 1.5$  METs), LIPA ( $> 1.5$  to  $< 3.0$  METs) and MVPA ( $\geq 3.0$  METs) were calculated. These MET levels have been used by previous studies examining functional decline among older adults<sup>15,16</sup>.

Depression was assessed using the Japanese language version of the 15-item Geriatric Depression scale (GDS-15)<sup>17</sup>. GDS-15 questionnaire includes 15 questions about participants' feelings in the past week. For example, "Do you often get bored? Yes / No". The score ranges from 0 to 15 and higher scores indicated stronger depression tendency. The GDS-15 has been widely used to assess depression symptom among older adults all over the world. In this study, the reliability of the GDS-15 (Cranach's alpha) was 0.81.

The following individual-level variables were considered as covariates: gender, age, body mass index, physical function, marital status, and educational attainment. Body mass index was objectively calculated by measuring the participants' height and weight. Physical function was assessed using the Japanese language version of the Medical Outcomes Survey Short Form-8 questionnaire<sup>18</sup>.

## Statistical Analysis



7

We tested the assumption that replacing SB with PA on may contribute to better older adults' depression. First, we confirmed that there are linear associations between PA, SB, and depression score and there was also no multicollinearity between independent variables. And then three multiple linear regression models including a single-activity, a partition, and an IS model were conducted to examine the associations of SB, LPA, and MVPA with depression. Since a 30 minutes was used as a unit for activity, the IS models assessed the effect of replacing a 30-minute of one activity with the equal time of another activity. Many previous studies using IS model have examined the effects of replacing a 30 minute<sup>5,8</sup> or a 60-minute<sup>6,7</sup> unit of SB with equal time of LPA or MVPA on various health outcomes. From the viewpoint of feasibility, replacing 60 minutes a day may be difficult for older adults<sup>19,20</sup>, therefore we chose the replacing 30 minutes in this study. The single-activity model analyzed each activity component separately (e.g., SB only), without considering the other activity types, adjusting for total wear time and confounders. The model (in the case of SB) is shown as follows:

The GDS-15 score = (b0) SB + (b3) total wear time + (b4) covariates.

The partition model analyzed all the activities simultaneously, without adjusting for total wear time. It is shown as below:

The GDS-15 score = (b0) SB + (b1) LPA + (b2) MVPA + (b4) covariates.

The coefficient for one type of activity represents the effect of increasing this type of activity while holding the other activities constant in this model. The model represents the effects of adding rather than substituting an activity type, because the total wear time is not included in the model (thus is not held constant).

The IS model assessed the effect of substituting one activity type with another for the equal amount of time (e.g., replacing LPA with SB, by removing SB from the model). The IS model (in the case of omitting SB from the model) is shown as follows:

8

The GDS-15 score = (b1) LPA + (b2) MVPA + (b3) total wear time + (b4) covariates.

The coefficients b1 and b2 in this model represent the effect of a 30 minutes substitution of SB with one of the activity types (LPA, or MVPA), while holding the other activity types and total wear time constant. For instance, b1 can be interpreted as the effect of replacing SB with LPA for 30 minutes, while holding MVPA and total wear time constant.

All analyses were conducted using IBM SPSS Statistics 20.0 for Windows (IBM Japan Corp., Tokyo, Japan), and the level of significance was set at  $p < 0.05$ .

### **Patient and Public Involvement statement**

Patients and public were not involved in developing the hypothesis, the specific aims or the research questions, nor were they involved in developing plans for design or implementation of the study.

### **RESULTS**

Of 349 participants, data from 276 participants (171 men, 105 women) were analyzed after excluding those with missing data; missing depression (4%) and covariates (0 to 3.7%) and lacking valid PA accelerometer data (12.6%). There were no significant differences in a rate of gender and a mean of age between analysis sample and those with missing data.

Table 1 shows the characteristics of study participants. The mean number of valid days of participant's wearing accelerometer was 7.2 days (SD = 0.9). On average, participants wore accelerometers for 15 hours/day, and the mean proportion of SB, LPA, and MVPA times to total accelerometer wearing time were 58%, 36%, and 6%, respectively. Correlation coefficients were  $-0.68$  between SB and LPA,  $-0.34$  between SB and MVPA, and  $0.21$

9

1  
2  
3 between LPA and MVPA. Table 2 shows the results for the single activity, partition, and IS  
4  
5 models with adjusting for covariates. The single-activity model shows that LPA was  
6  
7 significantly and favorably associated with the GDS-15 score ( $\beta = -.138, p < .05$ ), and SB  
8  
9 was significantly and positively associated with the GDS-15 score ( $\beta = .129, p < .05$ ). The  
10  
11 partition model showed no significant associations between all activities with the GDS-15  
12  
13 score. The IS model showed that a 30-minutes unit of SB replaced with LPA to be  
14  
15 significantly and negatively associated with the GDS-15 score ( $\beta = -.131, p < .05$ ).  
16  
17  
18  
19  
20  
21  
22

## 23 DISCUSSION

24  
25 This study examined how objectively-measured SB, LPA, and MVPA are associated with  
26  
27 depression among Japanese older adults, and how replacing these behaviors may influence  
28  
29 depression. Although many studies suggested that PA has favorable effects on depression in  
30  
31 both clinical and non-clinical population<sup>21-23</sup>, there is currently no consensus regarding the  
32  
33 optimal amount of PA needed to treat depression<sup>10</sup>. We found less SB and more LPA to be  
34  
35 negatively associated with older adults' depression in a single-activity model (including total  
36  
37 time held constant). Our findings are consistent with some recent studies that demonstrated  
38  
39 the favorable effects of LPA or reducing SB on depression for older adults<sup>4,24,25</sup>.  
40  
41  
42  
43  
44

45 In contrast with some previous studies<sup>26</sup>, we did not find any favorable effects of  
46  
47 MVPA on depression in the three multiple linear regression models. This may be because of  
48  
49 the age group (older adults), which was targeted in the current study. While relatively  
50  
51 consistent effects of MVPA on depression among children and adults were reported by  
52  
53 previous studies<sup>26</sup>, there are mixed findings among older adults<sup>27</sup>. For example, a  
54  
55  
56  
57  
58  
59

10

1  
2  
3 randomized controlled trial study with a large sample aged 18 to 71 years reported that the  
4 mean reduction in depression scores were significantly larger in the physical exercise and  
5 internet-based cognitive-behavioral therapy groups compared with treatment as usual <sup>28,29</sup>.  
6  
7 Furthermore, they compared the effects of different exercise intensities on post-treatment  
8 depression severity and found although there were no significant differences among light  
9 exercise, moderate-exercise, and vigorous exercise groups at post-treatment; the light  
10 exercise group reduced their depression score more than the moderate and vigorous exercise  
11 groups <sup>30</sup>. Jung et al. found that LPA was favorably associated with preventing depressive  
12 symptoms among older adults, but MVPA was not <sup>27</sup>. Nevertheless, our findings showed that  
13 replacing SB with LPA had beneficial effects on older adults' depression. We found that  
14 replacing only 30 minutes of SB with equal time of LPA during one day was associated with  
15 approximately 5% less depression score. Since our participants were relatively healthy, we  
16 did not consider the clinical meaning of decreasing depression score. However, a 5%  
17 reduction in depression score leads to 14 out of 62 people with a depression tendency (GDS  
18 score is over 5 point) return to normal range (GDS score is from 0 to 4 point). Currently, the  
19 evidence-based for the prescription of different PA and exercise intensities for depression is  
20 weak <sup>30</sup>. For older adults including physical frail people, however, our results may suggest  
21 that it will be effective to reduce SB time and increase LPA that accounts for a large  
22 proportion of activities in daily life in order to decrease depression. Among older adults, it  
23 may be more practical to increase 30 minutes of LPA per day compared with MVPA.  
24  
25  
26  
27  
28  
29  
30  
31  
32  
33  
34  
35  
36  
37  
38  
39  
40  
41  
42  
43  
44  
45  
46

47 This study has some limitations. The cause-and-effect relationship between SB, PA,  
48 and depression cannot be inferred from a cross-sectional study like ours. In addition, our  
49 findings may not be generalizable to the Japanese population, as relatively healthy, active,  
50 and well educated older adults appeared to have participated in this study. Thus, we suggest  
51 future intervention studies such as randomized controlled trial studies, using more  
52  
53  
54  
55  
56  
57  
58  
59  
60

11

1  
2  
3 participants and including frailer individuals, are needed in order to provide a more definitive  
4 interpretation of the present findings. Further, the context and type of SB was not assessed in  
5 this study. SB consists of different types: passive sedentary time (e.g. TV viewing and just  
6 sitting) and mentally-active sedentary time (e.g., computer and reading)<sup>31,32</sup>. Several recent  
7 studies have shown that these different types of SB may be differently associated with health  
8 outcomes including mental health<sup>31,33</sup>. Such a co-existence of different types of SB may play  
9 a role in the observed associations in this study. Further research is needed to explore the  
10 effects of replacing different types of SB with LPA and MVPA on depression symptoms. In  
11 addition, previous PA levels and exercise participation of participants (i.e. the amount of PA  
12 in the past 12 months) were not considered in this study. It is likely that previous amount of  
13 PA may affect the current depression status<sup>34</sup>. It is necessary to consider this point in further  
14 research. The strength of this study is the use of accelerometers to objectively measure  
15 participants' sedentary and active behaviors.  
16  
17  
18  
19  
20  
21  
22  
23  
24  
25  
26  
27  
28  
29  
30  
31  
32  
33

## 34 CONCLUSION

35  
36 Our findings indicated that replacing even small amounts of SB (e.g. watching TV and  
37 working at a desk) with LPA (e.g. indoor house-work and slow walking) are associated with  
38 less depression among older adults. Potential favorable effects were identified for replacing  
39 only 30 minutes per day of SB with LPA. These findings are useful in promoting mental  
40 health among older adults with better compliance, lower risk of injuries, and long-term  
41 sustainability  
42  
43  
44  
45  
46  
47  
48  
49  
50

## 51 Acknoulege

52 None.  
53  
54  
55  
56  
57  
58  
59  
60

12

**Contributors**

All authors contributed equally to this work. Oka: Study concept and design. Yasunaga, Shibata, Ishii, and Oka: Data analysis and interpretation and Statistical analysis. Yasunaga and Koohsari: Drafting of manuscript. Yasunaga, Koohsari, and Oka: Critical revision of manuscript for intellectual content, final approval of version to be published.

**Funding**

Yasunaga was supported by the JSPS KAKENHI Grant (#15K01534). Shibata was supported the JSPS KAKENHI Grant (#15K01647). Koohsari was supported by the JSPS Postdoctoral Fellowship for Research in Japan (#17716). Oka was supported by the MEXT-Supported Program for the Strategic Research Foundation at Private Universities, 2015-2019 the Japan Ministry of Education, Culture, Sports, Science and Technology (S1511017).

**Competing interest**

None declared.

**Ethics approval**

The study was approved by the Waseda University Institutional Committee on Human Research (2013-265), and the Institutional Review Board of Chiba Prefectural University of Health Sciences (2012-042).

**Data sharing statement**

No additional data sharing available.

**REFERENCES**

13

1. Nelson ME, Rejeski WJ, Blair SN, et al. Physical activity and public health in older adults: recommendation from the American College of Sports Medicine and the American Heart Association. *Circulation* 2007;116:1094-105.
2. Netz Y, Wu MJ, Becker BJ, et al. Physical activity and psychological well-being in advanced age: a meta-analysis of intervention studies. *Psychol Aging* 2005;20:272-84.
3. Hamer M, Stamatakis E. Prospective study of sedentary behavior, risk of depression, and cognitive impairment. *Med Sci Sports Exerc* 2014;46:718-23.
4. Loprinzi PD. Objectively measured light and moderate-to-vigorous physical activity is associated with lower depression levels among older US adults. *Aging Ment Health* 2013;17:801-5.
5. Buman MP, Winkler EA, Kurka JM, et al. Reallocating time to sleep, sedentary behaviors, or active behaviors: associations with cardiovascular disease risk biomarkers, NHANES 2005-2006. *Am J Epidemiol* 2014;179:323-34.
6. Stamatakis E, Rogers K, Ding D, et al. All-cause mortality effects of replacing sedentary time with physical activity and sleeping using an isotemporal substitution model: a prospective study of 201,129 mid-aged and older adults. *Int J Behav Nutr Phys Act* 2015;12:121.
7. Mekary RA, Lucas M, Pan A, et al. Isotemporal substitution analysis for physical activity, television watching, and risk of depression. *Am J Epidemiol* 2013;178:474-83.
8. Dillon CB, McMahon E, O'Regan G, et al. Associations between physical behaviour patterns and levels of depressive symptoms, anxiety and well-being in middle-aged adults: a cross-sectional study using isotemporal substitution models. *BMJ Open* 2018;8:e018978.
9. Stewart AL, Mills KM, King AC, et al. CHAMPS physical activity questionnaire for older adults: outcomes for interventions. *Med Sci Sports Exerc* 2001;33:1126-41.

14

10. Hallgren M, Herring MP, Owen N, et al. Exercise, Physical activity, and sedentary behavior in the treatment of depression: Broadening the scientific perspectives and clinical opportunities. *Front Psychiatry* 2016;7:36.
11. Kurita S, Yano S, Ishii K, et al. Comparability of activity monitors used in Asian and Western-country studies for assessing free-living sedentary behaviour. *PLoS One* 2017;12:e0186523.
12. Ohkawara K, Oshima Y, Hikiyama Y, et al. Real-time estimation of daily physical activity intensity by a triaxial accelerometer and a gravity-removal classification algorithm. *Br J Nutr* 2011;105:1681-91.
13. Oshima Y, Kawaguchi K, Tanaka S, et al. Classifying household and locomotive activities using a triaxial accelerometer. *Gait Posture* 2010;31:370-4.
14. Healy GN, Matthews CE, Dunstan DW, et al. Sedentary time and cardio-metabolic biomarkers in US adults: NHANES 2003-06. *Eur Heart J* 2011;32:590-7.
15. Blair CK, Morey MC, Desmond RA, et al. Light-intensity activity attenuates functional decline in older cancer survivors. *Med Sci Sports Exerc* 2014;46:1375-83.
16. Chmelo E, Nicklas B, Davis C, et al. Physical activity and physical function in older adults with knee osteoarthritis. *J Phys Act Health* 2013;10:777-83.
17. Niino N, Imaizumi T, Kawakami N. A Japanese translation of the Geriatric Depression Scale. *Clin Gerontol* 1991;10:85-7.
18. Fukuhara S, Suzukamo Y. Manual of the SF-8 Japanese Version. Kyoto: *Institute for Health Outcome & Process Evaluation Research*; 2004.
19. Fitzsimons CF, Kirk A, Baker G, et al. Using an individualised consultation and activPAL feedback to reduce sedentary time in older Scottish adults: results of a feasibility and pilot study. *Prev Med* 2013;57:718-20.



15

- 1  
2  
3  
4  
5  
6  
7  
8  
9  
10  
11  
12  
13  
14  
15  
16  
17  
18  
19  
20  
21  
22  
23  
24  
25  
26  
27  
28  
29  
30  
31  
32  
33  
34  
35  
36  
37  
38  
39  
40  
41  
42  
43  
44  
45  
46  
47  
48  
49  
50  
51  
52  
53  
54  
55  
56  
57  
58  
59  
60
20. Gardiner PA, Eakin EG, Healy GN, et al. Feasibility of reducing older adults' sedentary time. *Am J Prev Med* 2011;41:174-7.
21. Rebar AL, Stanton R, Geard D, et al. A meta-meta-analysis of the effect of physical activity on depression and anxiety in non-clinical adult populations. *Health Psychol Rev* 2015;9:366-78.
22. Cooney GM, Dwan K, Greig CA, et al. Exercise for depression. *Cochrane Database Syst Rev* 2013;12:CD004366.
23. Fukukawa Y, Nakashima C, Tsuboi S, et al. Age differences in the effect of physical activity on depressive symptoms. *Psychol Aging* 2004;19:346-51.
24. Tse AC, Wong TW, Lee PH. Effect of Low-intensity exercise on physical and cognitive health in older adults: a systematic review. *Sports Med Open* 2015;1:37.
25. Zhai L, Zhang Y, Zhang D. Sedentary behaviour and the risk of depression: a meta-analysis. *Br J Sports Med* 2015;49:705-9.
26. Dore I, O'Loughlin JL, Beauchamp G, et al. Volume and social context of physical activity in association with mental health, anxiety and depression among youth. *Prev Med* 2016;91:344-50.
27. Jung S, Lee S, Lee S, et al. Relationship between physical activity levels and depressive symptoms in community-dwelling older Japanese adults. *Geriatr Gerontol Int* 2018;18:421-7.
28. Hallgren M, Kraepelien M, Ojehagen A, et al. Physical exercise and internet-based cognitive-behavioural therapy in the treatment of depression: randomised controlled trial. *Br J Psychiatry* 2015;207:227-34.
29. Hallgren M, Helgadottir B, Herring MP, et al. Exercise and internet-based cognitive-behavioural therapy for depression: multicentre randomised controlled trial with 12-month follow-up. *Br J Psychiatry* 2016;209:414-20.

16

- 1  
2  
3  
4  
5  
6  
7  
8  
9  
10  
11  
12  
13  
14  
15  
16  
17  
18  
19  
20  
21  
22  
23  
24  
25  
26  
27  
28  
29  
30  
31  
32  
33  
34  
35  
36  
37  
38  
39  
40  
41  
42  
43  
44  
45  
46  
47  
48  
49  
50  
51  
52  
53  
54  
55  
56  
57  
58  
59  
60
30. Helgadottir B, Hallgren M, Ekblom O et al. Training fast or slow? Exercise for depression: A randomized controlled trial. *Prev Med* 2016;91:123-31.
31. Kikuchi H, Inoue S, Sugiyama T, et al. Distinct associations of different sedentary behaviors with health-related attributes among older adults. *Prev Med* 2014;67:335-9.
32. Wullems JA, Verschueren SM, Degens H, et al. A review of the assessment and prevalence of sedentarism in older adults, its physiology/health impact and non-exercise mobility counter-measures. *Biogerontology* 2016;17:547-65.
33. Kesse-Guyot E, Charreire H, Andreeva VA, et al. Cross-sectional and longitudinal associations of different sedentary behaviors with cognitive performance in older adults. *PLoS One* 2012;7:e47831.
34. Yoshiuchi K, Nakahara R, Kumano H, et al. Yearlong physical activity and depressive symptoms in older Japanese adults: cross-sectional data from the Nakanajo study. *Am J Geriatr Psychiatry* 2006;14:621-4.

Table 1. Characteristics of study participants

|                                                                              | n or M (SD), % |       |
|------------------------------------------------------------------------------|----------------|-------|
| Gender                                                                       |                |       |
| <i>Women</i>                                                                 | 105            | 38.0% |
| Age (years)                                                                  | 74.4           | 5.3   |
| Body mass index (kg/m <sup>2</sup> )                                         | 23.5           | 3.2   |
| Physical function                                                            | 49.7           | 5.3   |
| Marital status                                                               |                |       |
| <i>Married</i>                                                               | 228            | 82.6% |
| Educational attainment                                                       |                |       |
| <i>University, junior college, vocational school, or higher-level degree</i> | 109            | 39.5% |
| Total accelerometer wear time (min/day)                                      | 902.9          | 86.7  |
| SB (min/day)                                                                 | 524.6          | 113.3 |
| LPA (min/day)                                                                | 328.8          | 101.3 |
| MVPA (min/day)                                                               | 50.0           | 32.8  |
| GDS-15 score                                                                 | 2.8            | 3.0   |

*Note.* SB=Sedentary behavior, LPA=Light-intensity physical activity, MVPA= Moderate-to-vigorous physical activity, GDS-15 = the 15-item Geriatric Depression scale.

Table 2. The associations of SB, LPA, and MVPA with depression

|                       | SB      |                 | LPA     |                   | MVPA    |                 |
|-----------------------|---------|-----------------|---------|-------------------|---------|-----------------|
|                       | $\beta$ | 95%CI           | $\beta$ | 95%CI             | $\beta$ | 95%CI           |
| Single-activity model | 0.129   | (0.015, 0.243)* | -0.138  | (-0.265, -0.011)* | -0.173  | (-0.530, 0.184) |
| Partition model       | 0.101   | (-0.031, 0.233) | -0.030  | (-0.184, 0.124)   | -0.011  | (-0.390, 0.367) |
| Isotemporal model     |         |                 |         |                   |         |                 |
| Replace SB with       |         | Dropped         | -0.131  | (-0.260, -0.002)* | -0.113  | (-0.473, 0.247) |
| Replace LPA with      | 0.132   | (0.003, 0.261)* |         | Dropped           | 0.020   | (-0.383, 0.422) |
| Replace MVPA with     | 0.118   | (-0.242, 0.477) | -0.013  | (-0.395, 0.361)   |         | Dropped         |

*Note.* SB=Sedentary behavior, LPA=Light-intensity physical activity, MVPA=Moderate-to-vigorous physical activity,  $\beta$ = Regression coefficients correspond to a 30-minutes increment of each activity, CI= Confidence intervals, \*  $p < 0.05$ .

All models adjusted for gender, age, body mass index, physical function, marital status, educational attainment, and total accelerometer wear time.

| Item                         | #  | Recommendation                                                                                                                                                                                                                                                                                                                                                                                                                                                         | Response                                                          |
|------------------------------|----|------------------------------------------------------------------------------------------------------------------------------------------------------------------------------------------------------------------------------------------------------------------------------------------------------------------------------------------------------------------------------------------------------------------------------------------------------------------------|-------------------------------------------------------------------|
| <b>Title and Abstract</b>    | 1  | (a) Indicate the study's design with a commonly used term in the title or the abstract                                                                                                                                                                                                                                                                                                                                                                                 | Yes (see page 1 and 2; <i>Title Page and Abstract</i> )           |
|                              |    | (b) Provide in the abstract an informative and balanced summary of what was done and what was found                                                                                                                                                                                                                                                                                                                                                                    | Yes (see page 2; <i>Abstract</i> )                                |
| <b>Introduction</b>          |    |                                                                                                                                                                                                                                                                                                                                                                                                                                                                        |                                                                   |
| Background/rationale         | 2  | Explain the scientific background and rationale for the investigation being reported                                                                                                                                                                                                                                                                                                                                                                                   | Yes (see page 4-5; <i>Introduction</i> )                          |
| Objectives                   | 3  | State specific objectives, including any prespecified hypotheses                                                                                                                                                                                                                                                                                                                                                                                                       | Yes (see page 5; <i>Introduction</i> )                            |
| <b>Methods</b>               |    |                                                                                                                                                                                                                                                                                                                                                                                                                                                                        |                                                                   |
| Study design                 | 4  | Present key elements of study design early in the paper                                                                                                                                                                                                                                                                                                                                                                                                                | Yes (see page 6-7; <i>Statistical Analysis</i> )                  |
| Setting                      | 5  | Describe the setting, locations, and relevant dates, including periods of recruitment, exposure, follow-up, and data collection                                                                                                                                                                                                                                                                                                                                        | Yes (see page 5; <i>Participants and Data Collection</i> )        |
| Participants                 | 6  | (a) <i>Cohort study</i> —Give the eligibility criteria, and the sources and methods of selection of participants. Describe methods of follow-up<br><i>Case-control study</i> —Give the eligibility criteria, and the sources and methods of case ascertainment and control selection. Give the rationale for the choice of cases and controls<br><i>Cross-sectional study</i> —Give the eligibility criteria, and the sources and methods of selection of participants | Yes (see page 5; <i>Participants and Data Collection</i> )        |
|                              |    | (b) <i>Cohort study</i> —For matched studies, give matching criteria and number of exposed and unexposed<br><i>Case-control study</i> —For matched studies, give matching criteria and the number of controls per case                                                                                                                                                                                                                                                 | NA                                                                |
| Variables                    | 7  | Clearly define all outcomes, exposures, predictors, potential confounders, and effect modifiers. Give diagnostic criteria, if applicable                                                                                                                                                                                                                                                                                                                               | Yes (see page 5-6; <i>Measurements</i> )                          |
| Data sources/<br>measurement | 8* | For each variable of interest, give sources of data and details of methods of assessment (measurement). Describe comparability of assessment methods if there is more than one group                                                                                                                                                                                                                                                                                   | Yes (see page 5-6; <i>Measurements</i> )                          |
| Bias                         | 9  | Describe any efforts to address potential sources of bias                                                                                                                                                                                                                                                                                                                                                                                                              | Yes (see page 8; "Results" for the list of excluded participants) |
| Study size                   | 10 | Explain how the study size was arrived at                                                                                                                                                                                                                                                                                                                                                                                                                              | This is a secondary analysis of a study                           |

|                        |     |                                                                                                                                                                                                                                                                                                           |                                                                                           |
|------------------------|-----|-----------------------------------------------------------------------------------------------------------------------------------------------------------------------------------------------------------------------------------------------------------------------------------------------------------|-------------------------------------------------------------------------------------------|
| Quantitative variables | 11  | Explain how quantitative variables were handled in the analyses. If applicable, describe which groupings were chosen and why                                                                                                                                                                              | Yes (see page 6-7; <i>Statistical Analysis</i> )                                          |
| Statistical methods    | 12  | (a) Describe all statistical methods, including those used to control for confounding                                                                                                                                                                                                                     | Yes (see page 6-7; <i>Statistical Analysis</i> )                                          |
|                        |     | (b) Describe any methods used to examine subgroups and interactions                                                                                                                                                                                                                                       | Yes (see page 6-7; <i>Statistical Analysis</i> )                                          |
|                        |     | (c) Explain how missing data were addressed                                                                                                                                                                                                                                                               | Yes (see page 8; <i>Results</i> )                                                         |
|                        |     | (d) <i>Cohort study</i> —If applicable, explain how loss to follow-up was addressed<br><i>Case-control study</i> —If applicable, explain how matching of cases and controls was addressed<br><i>Cross-sectional study</i> —If applicable, describe analytical methods taking account of sampling strategy | NA                                                                                        |
|                        |     | (e) Describe any sensitivity analyses                                                                                                                                                                                                                                                                     | NA                                                                                        |
| <b>Results</b>         |     |                                                                                                                                                                                                                                                                                                           |                                                                                           |
| Participants           | 13* | (a) Report numbers of individuals at each stage of study—eg numbers potentially eligible, examined for eligibility, confirmed eligible, included in the study, completing follow-up, and analysed                                                                                                         | Yes (see page 8; <i>Results</i> )                                                         |
|                        |     | (b) Give reasons for non-participation at each stage                                                                                                                                                                                                                                                      | NA                                                                                        |
|                        |     | (c) Consider use of a flow diagram                                                                                                                                                                                                                                                                        | This is not a complicated study. We think that text explanation is sufficient.            |
| Descriptive data       | 14* | (a) Give characteristics of study participants (eg demographic, clinical, social) and information on exposures and potential confounders                                                                                                                                                                  | Yes (see page 16; <i>Table 1</i> )                                                        |
|                        |     | (b) Indicate number of participants with missing data for each variable of interest                                                                                                                                                                                                                       | Yes (see page 8; <i>Results</i> )                                                         |
|                        |     | (c) <i>Cohort study</i> —Summarise follow-up time (eg, average and total amount)                                                                                                                                                                                                                          | NA                                                                                        |
| Outcome data           | 15* | <i>Cohort study</i> —Report numbers of outcome events or summary measures over time                                                                                                                                                                                                                       | NA                                                                                        |
|                        |     | <i>Case-control study</i> —Report numbers in each exposure category, or summary measures of exposure                                                                                                                                                                                                      | NA                                                                                        |
|                        |     | <i>Cross-sectional study</i> —Report numbers of outcome events or summary measures                                                                                                                                                                                                                        | Yes (see page 16; <i>Table 1</i> )                                                        |
| Main results           | 16  | (a) Give unadjusted estimates and, if applicable, confounder-adjusted estimates and their precision (eg, 95% confidence interval). Make clear which confounders were adjusted for and why they were included                                                                                              | We reported only the adjusted estimates in order not to inflate the results with too many |

|                          |    |                                                                                                                                                                            |                                          |
|--------------------------|----|----------------------------------------------------------------------------------------------------------------------------------------------------------------------------|------------------------------------------|
|                          |    |                                                                                                                                                                            | estimates.                               |
|                          |    | (b) Report category boundaries when continuous variables were categorized                                                                                                  | NA                                       |
|                          |    | (c) If relevant, consider translating estimates of relative risk into absolute risk for a meaningful time period                                                           | NA                                       |
| Other analyses           | 17 | Report other analyses done—eg analyses of subgroups and interactions, and sensitivity analyses                                                                             | NA                                       |
| <b>Discussion</b>        |    |                                                                                                                                                                            |                                          |
| Key results              | 18 | Summarise key results with reference to study objectives                                                                                                                   | Yes (see page 11; <i>Conclusion</i> )    |
| Limitations              | 19 | Discuss limitations of the study, taking into account sources of potential bias or imprecision. Discuss both direction and magnitude of any potential bias                 | Yes (see page 10-11; <i>Discussion</i> ) |
| Interpretation           | 20 | Give a cautious overall interpretation of results considering objectives, limitations, multiplicity of analyses, results from similar studies, and other relevant evidence | Yes (see page 10-11; <i>Discussion</i> ) |
| Generalisability         | 21 | Discuss the generalisability (external validity) of the study results                                                                                                      | Yes (see page 10-11; <i>Discussion</i> ) |
| <b>Other information</b> |    |                                                                                                                                                                            |                                          |
| Funding                  | 22 | Give the source of funding and the role of the funders for the present study and, if applicable, for the original study on which the present article is based              | Yes (see page 11-12; <i>Funding</i> )    |

\*Give information separately for cases and controls in case-control studies and, if applicable, for exposed and unexposed groups in cohort and cross-sectional studies.

**Note:** An Explanation and Elaboration article discusses each checklist item and gives methodological background and published examples of transparent reporting. The STROBE checklist is best used in conjunction with this article (freely available on the Web sites of PLoS Medicine at <http://www.plosmedicine.org/>, Annals of Internal Medicine at <http://www.annals.org/>, and Epidemiology at <http://www.epidem.com/>). Information on the STROBE Initiative is available at [www.strobe-statement.org](http://www.strobe-statement.org).
